# Supplementary material for: Genome-wide identification of RNA editing in seven porcine tissues by matched DNA and RNA high-throughput sequencing
Source: PubMed Central journal article supplement (PMC6415349; doi:10.1186/s40104-019-0326-9), 2019-03-13

**Figure S1**

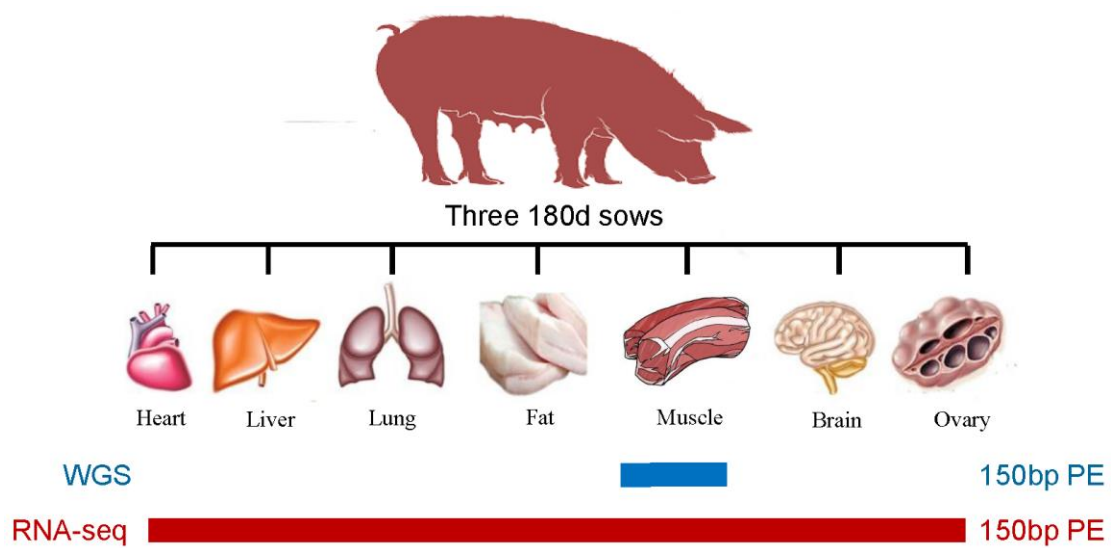

# Figure S2

## S2-1

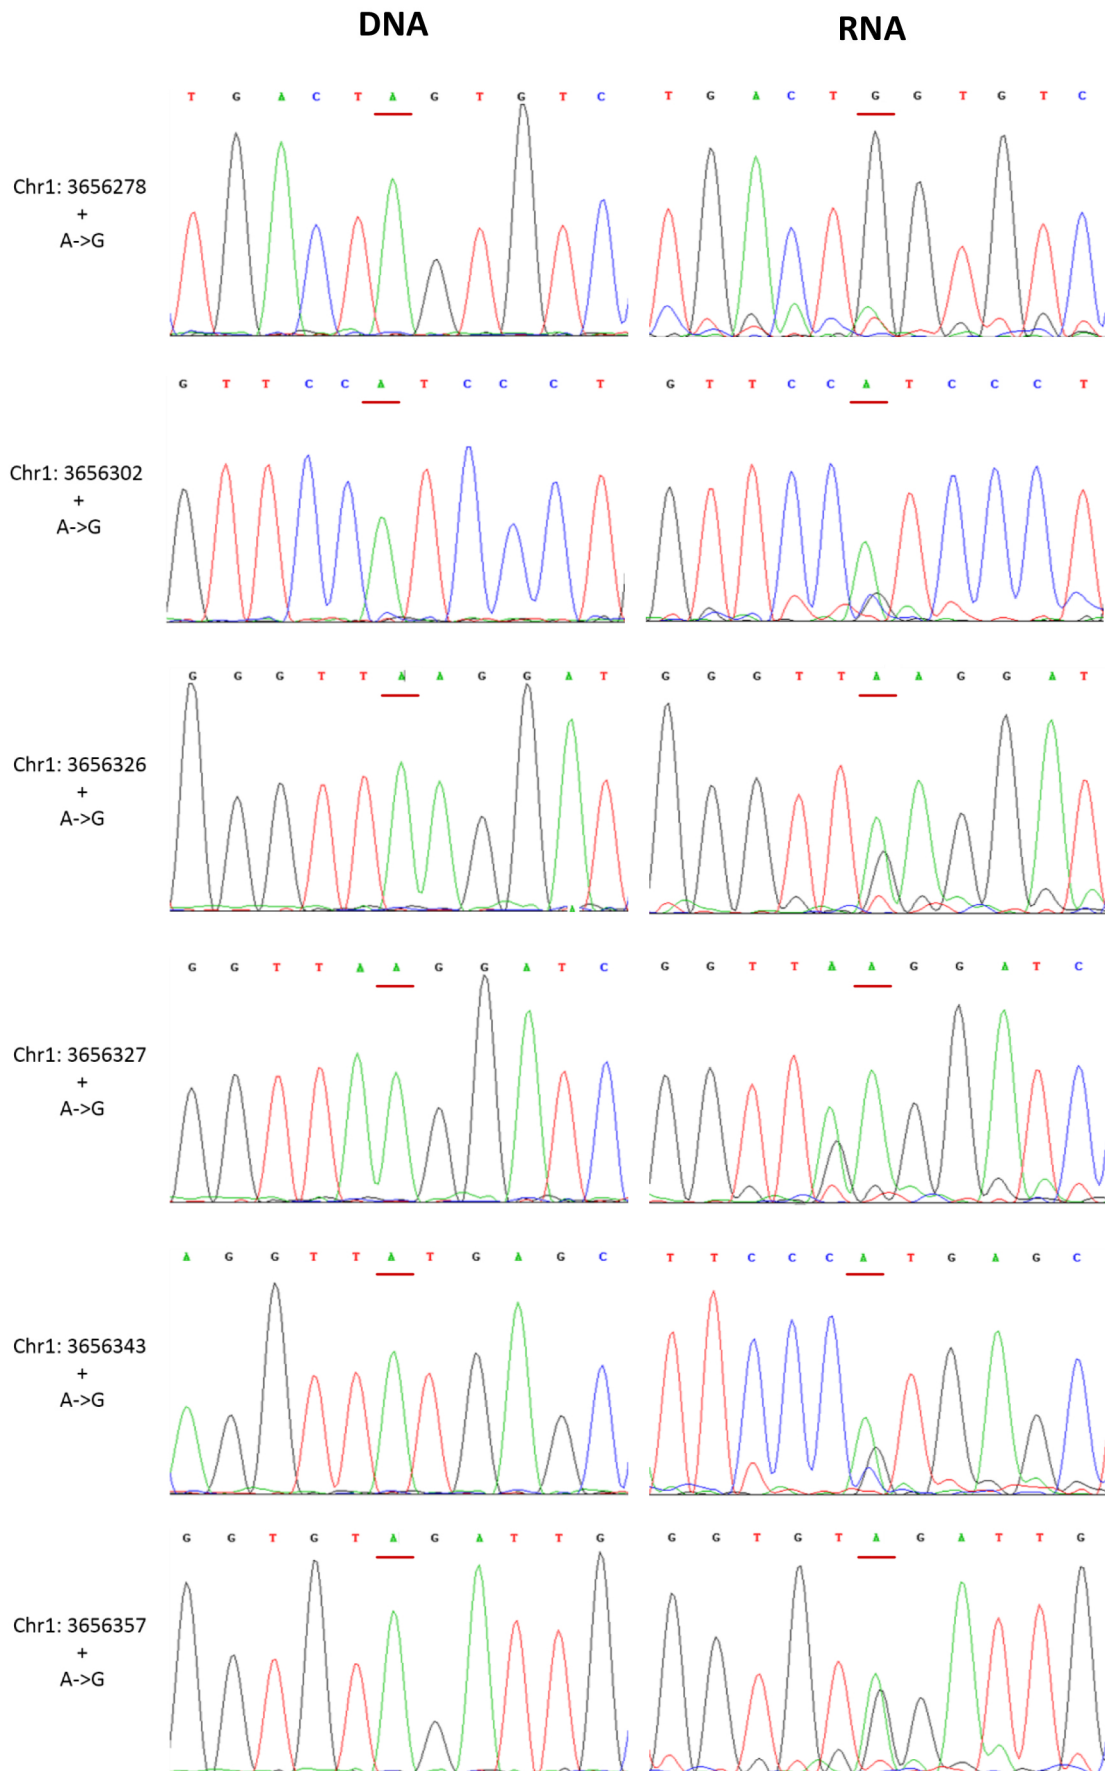

S2-2

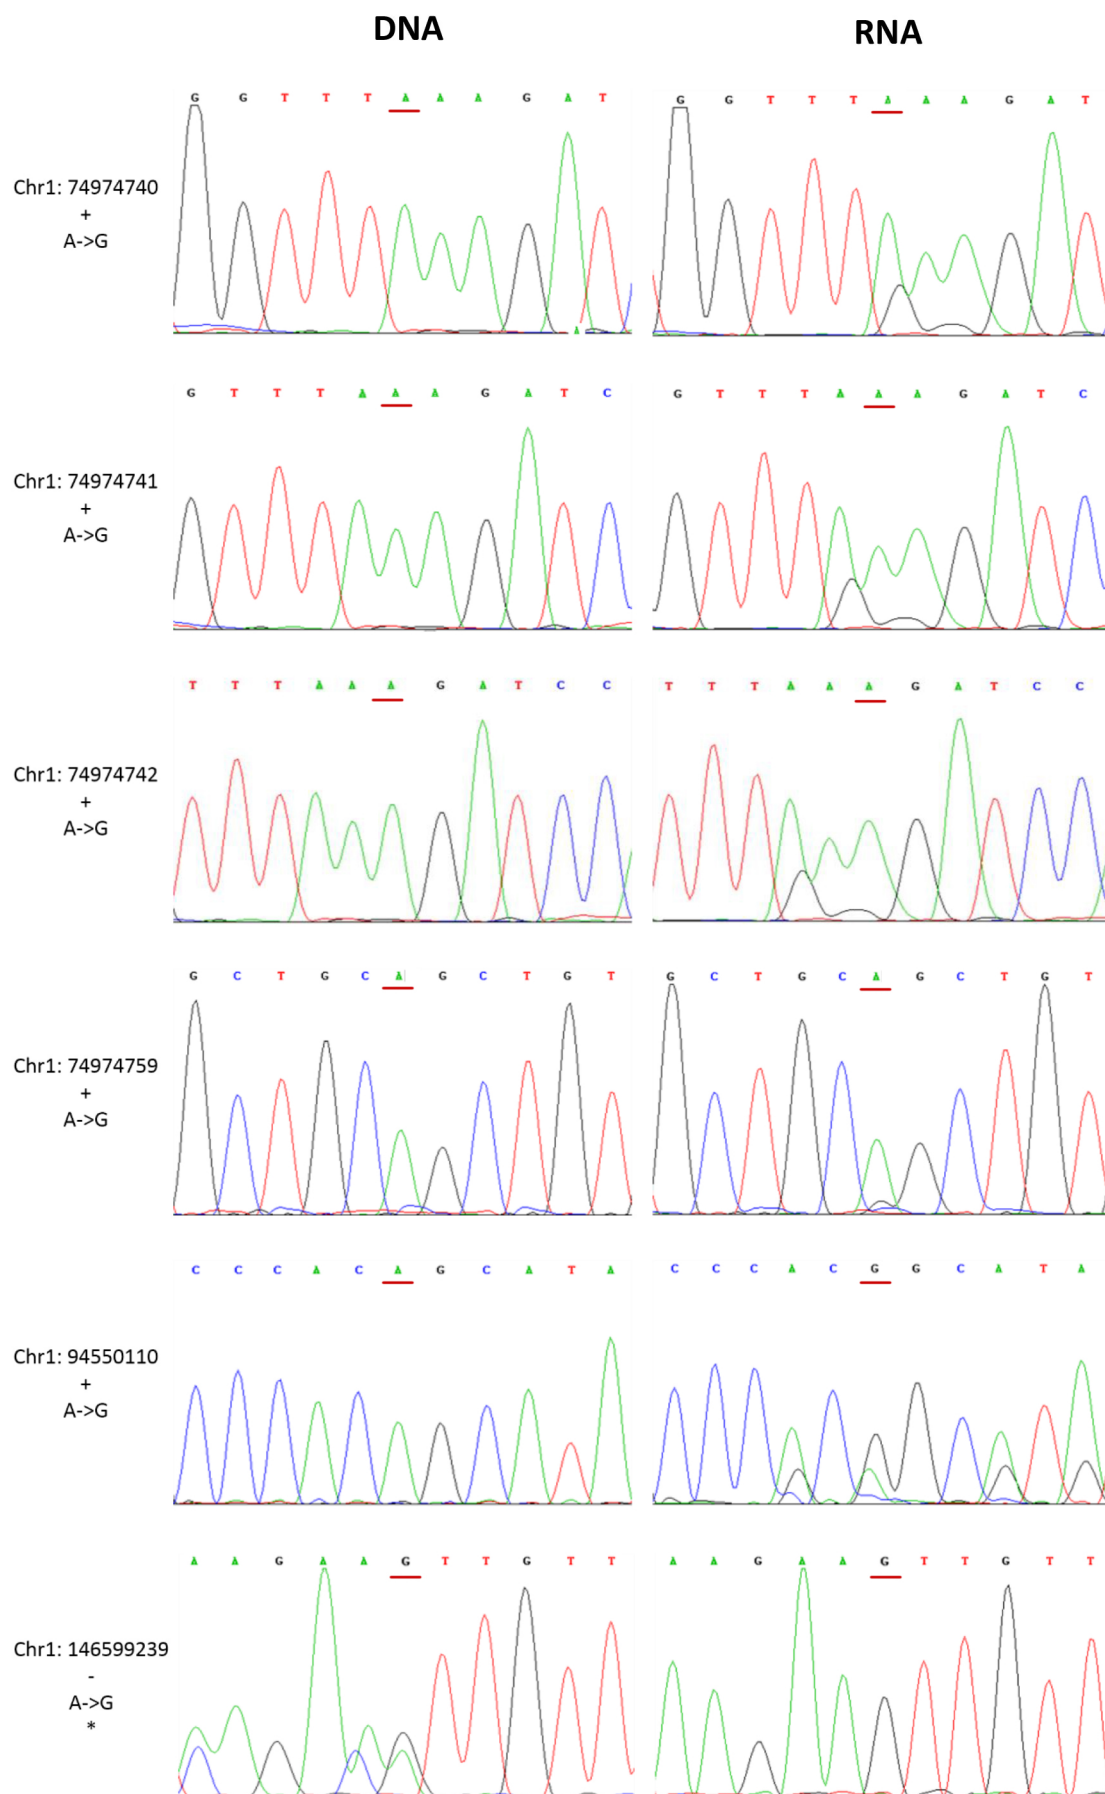

S2-3

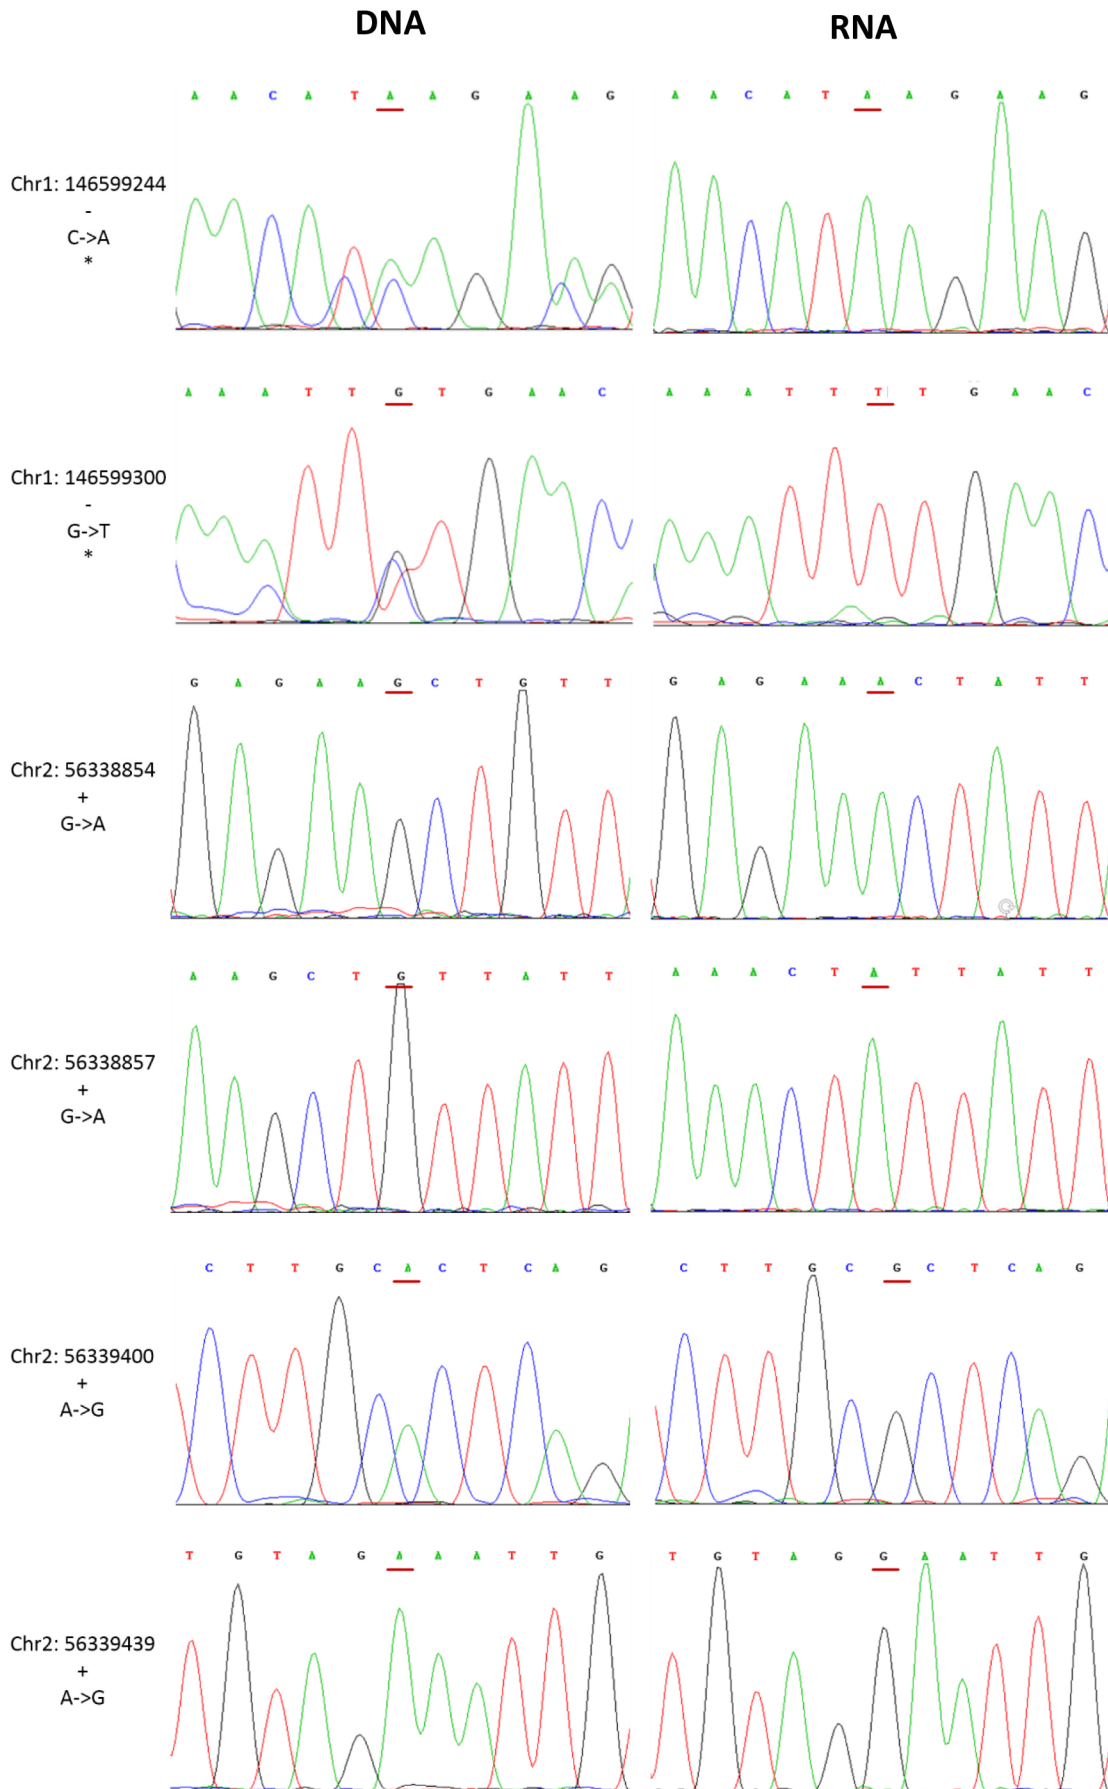

S2-4

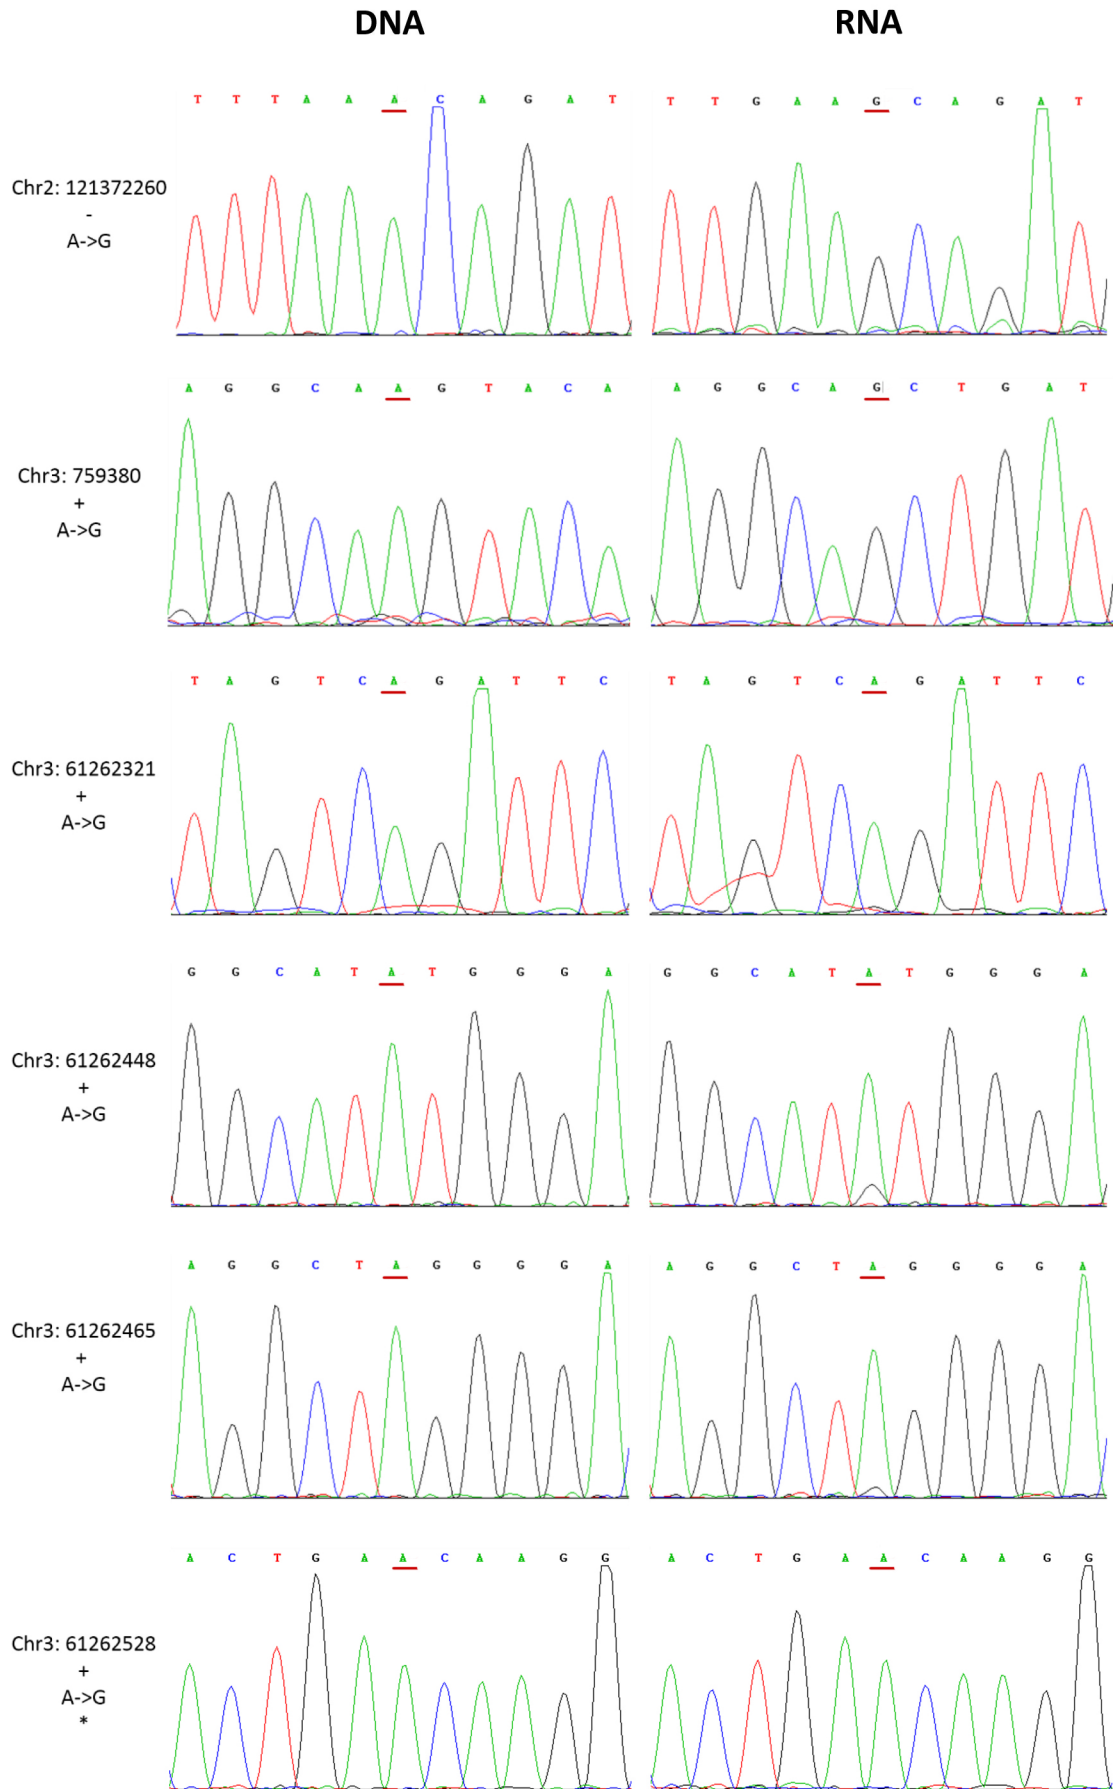

S2-5

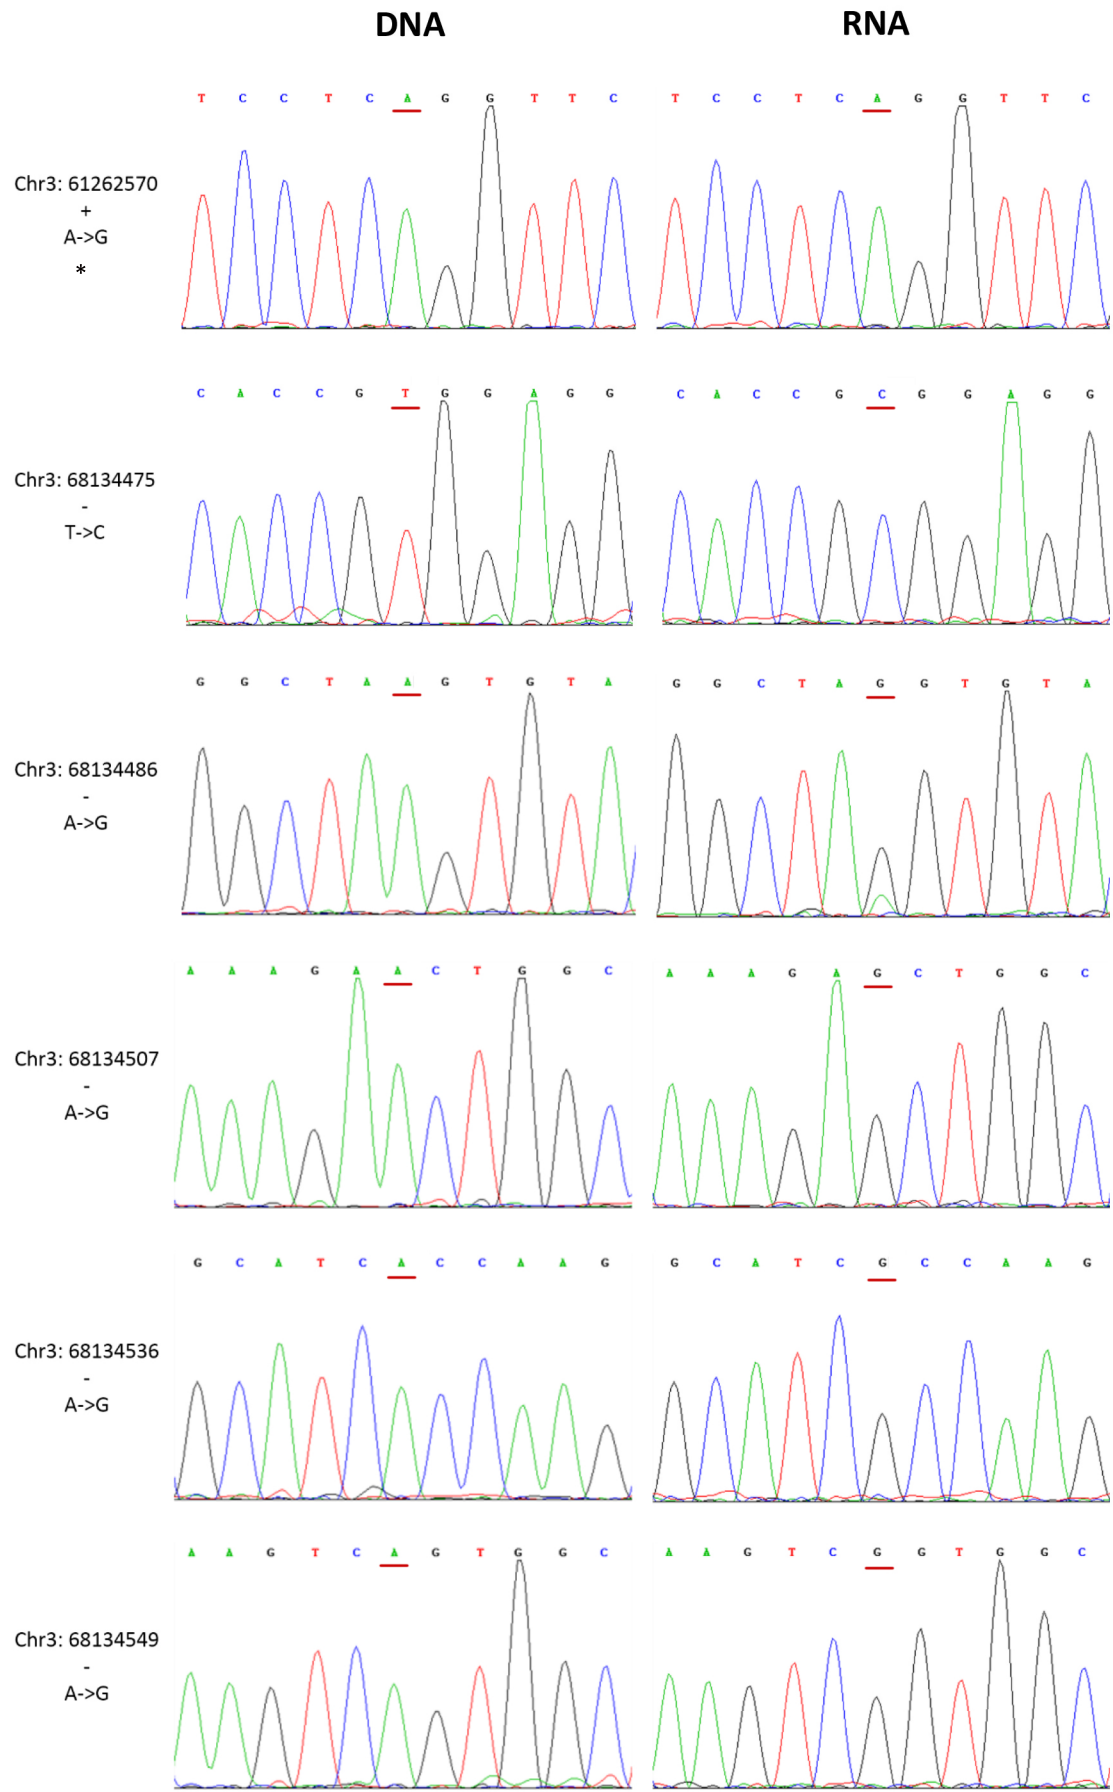

S2-6

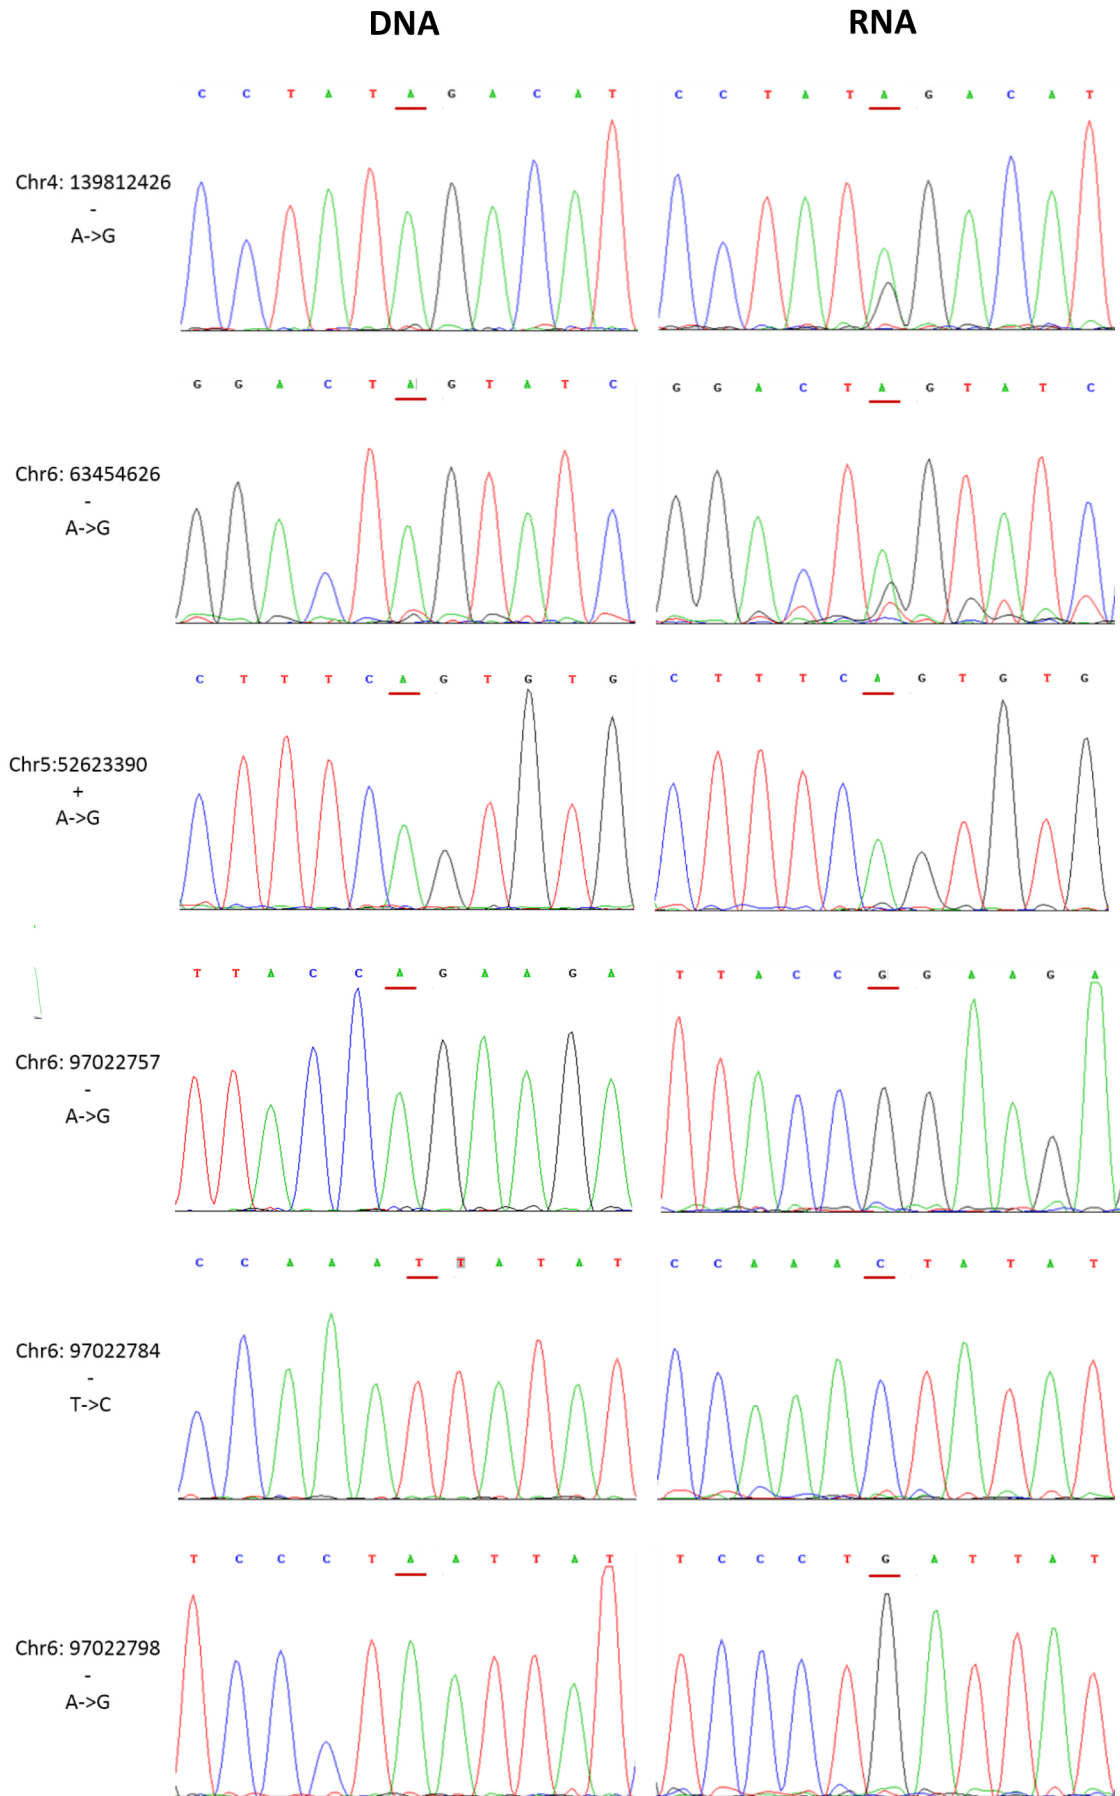

S2-7

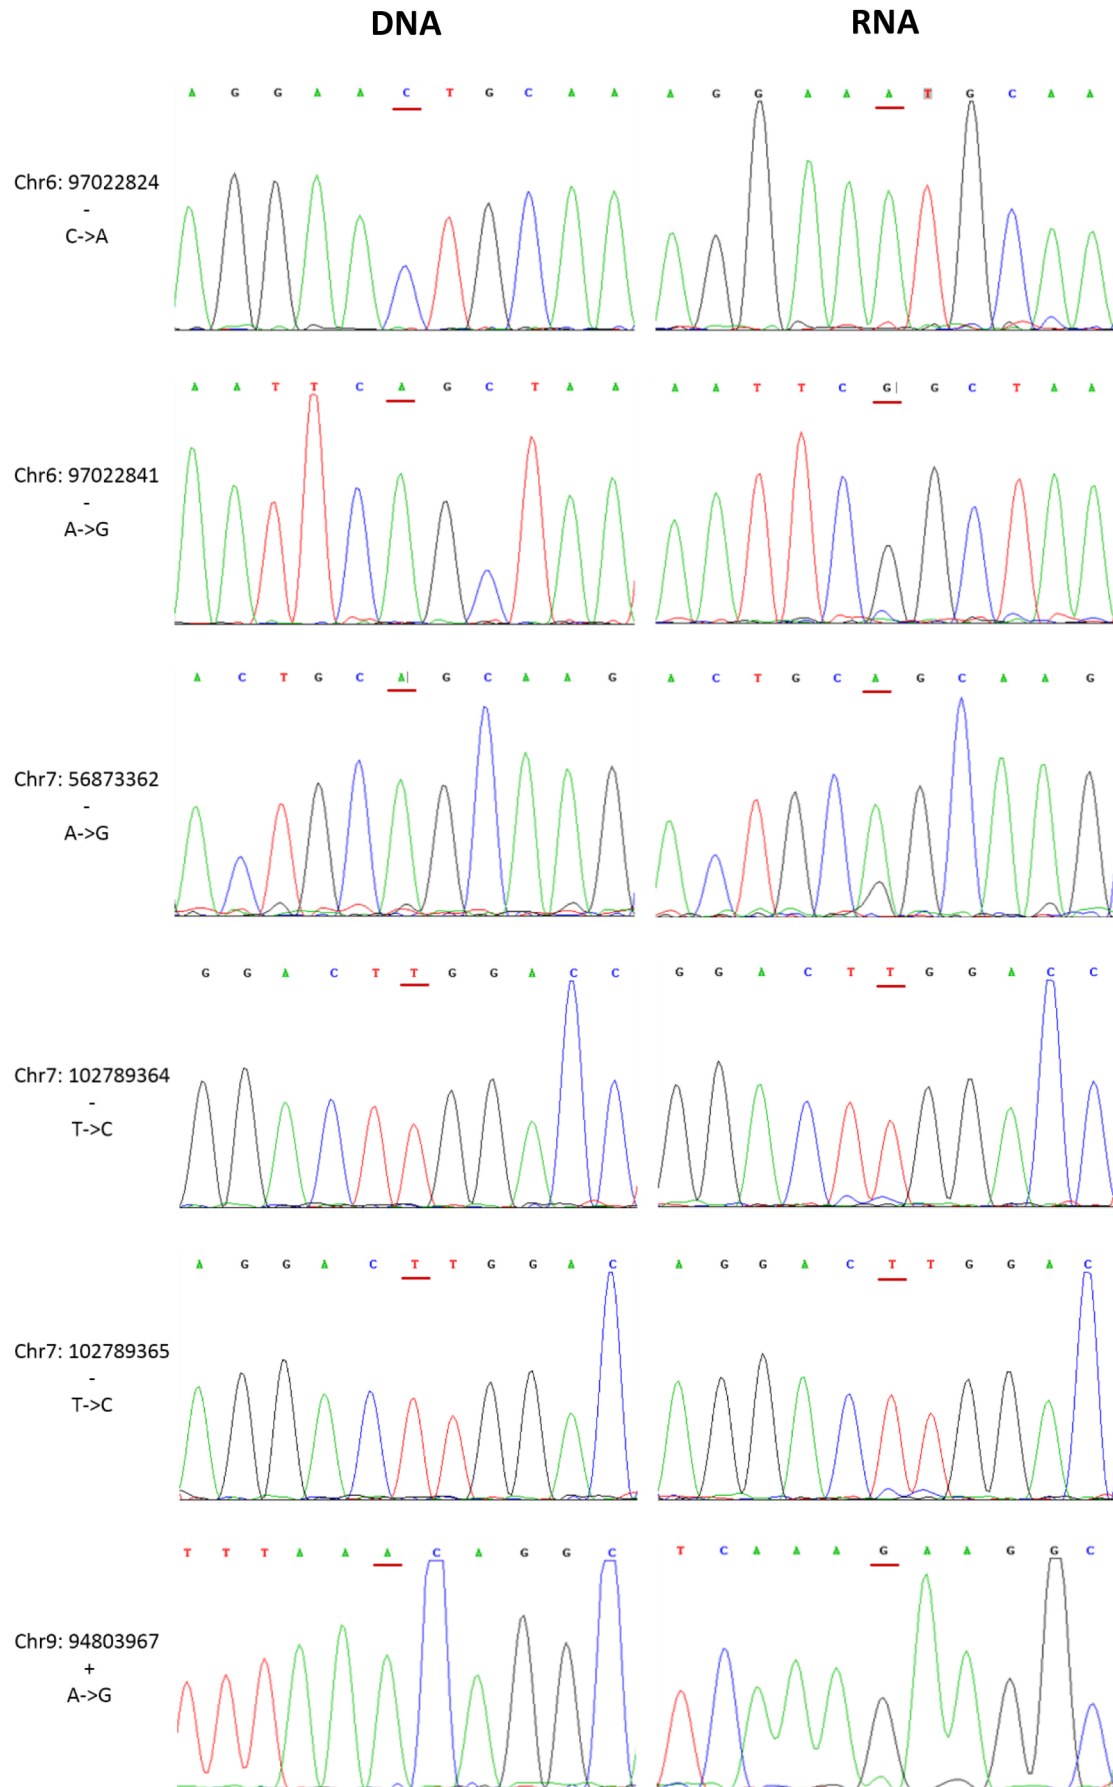



S2-8

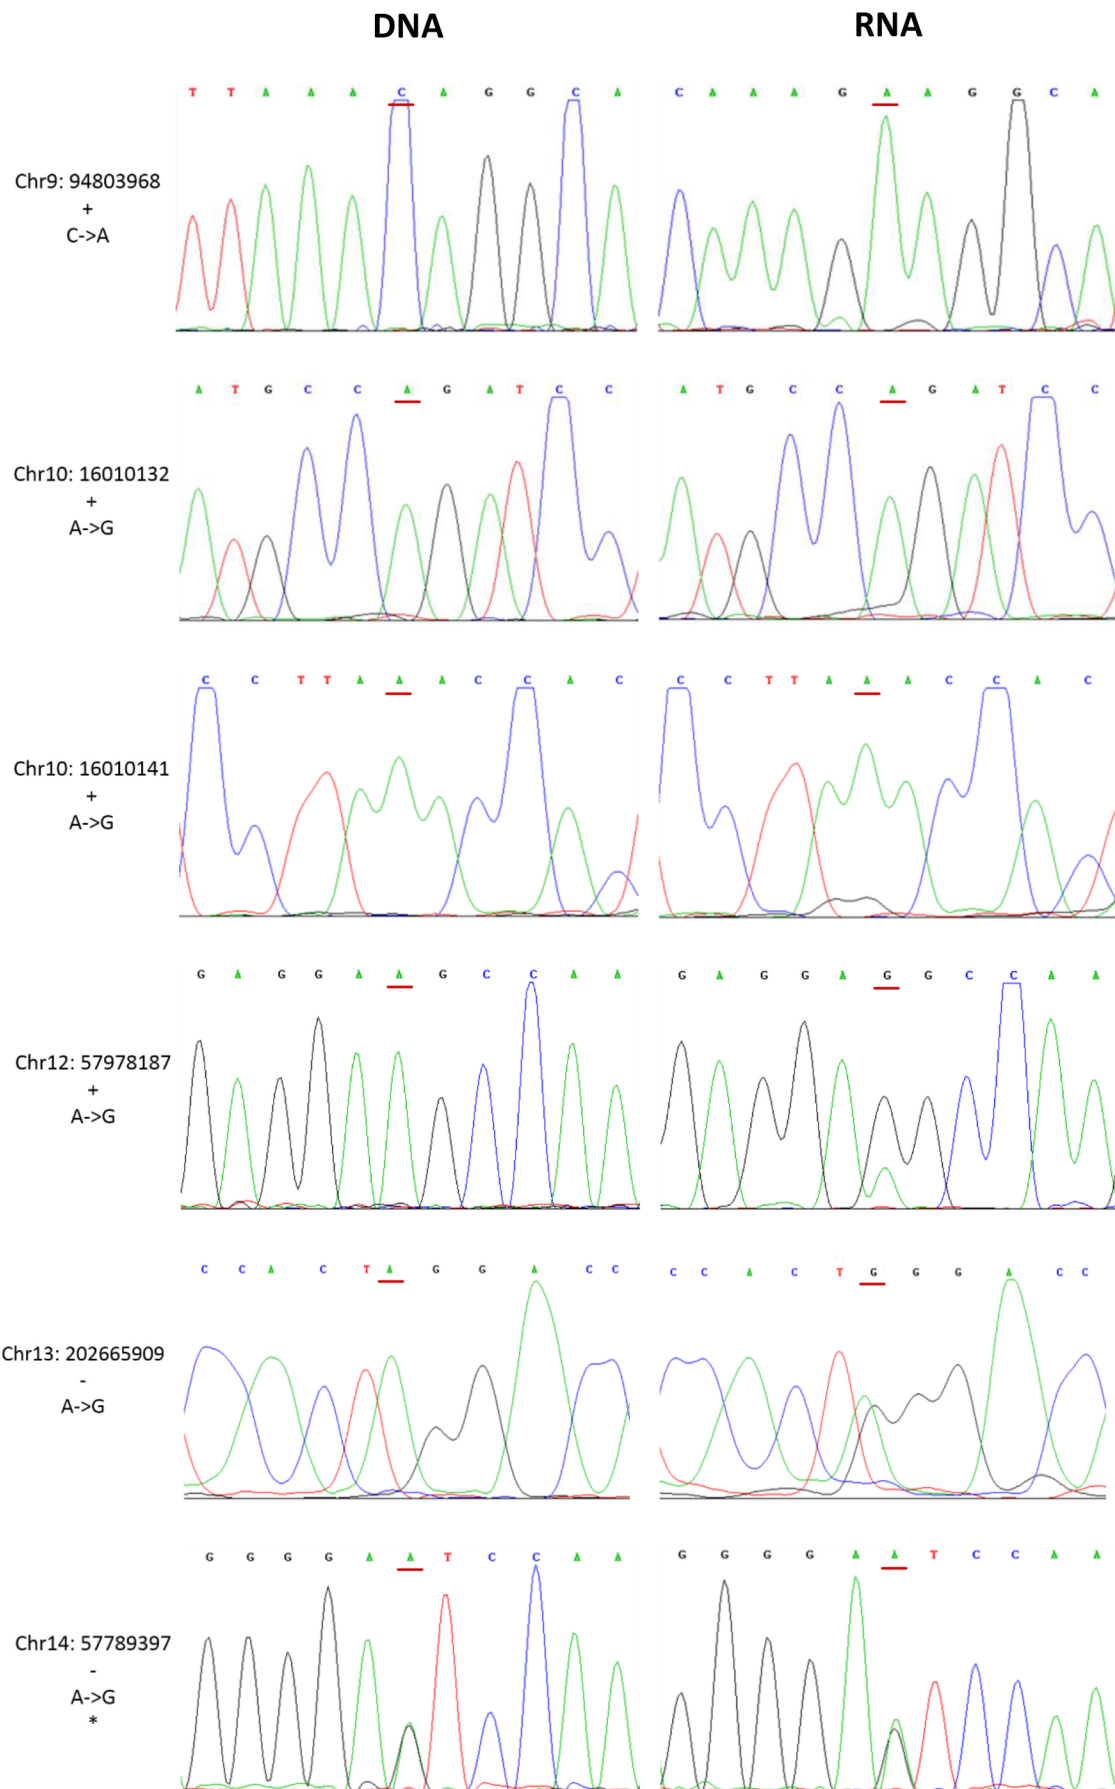

S2-9

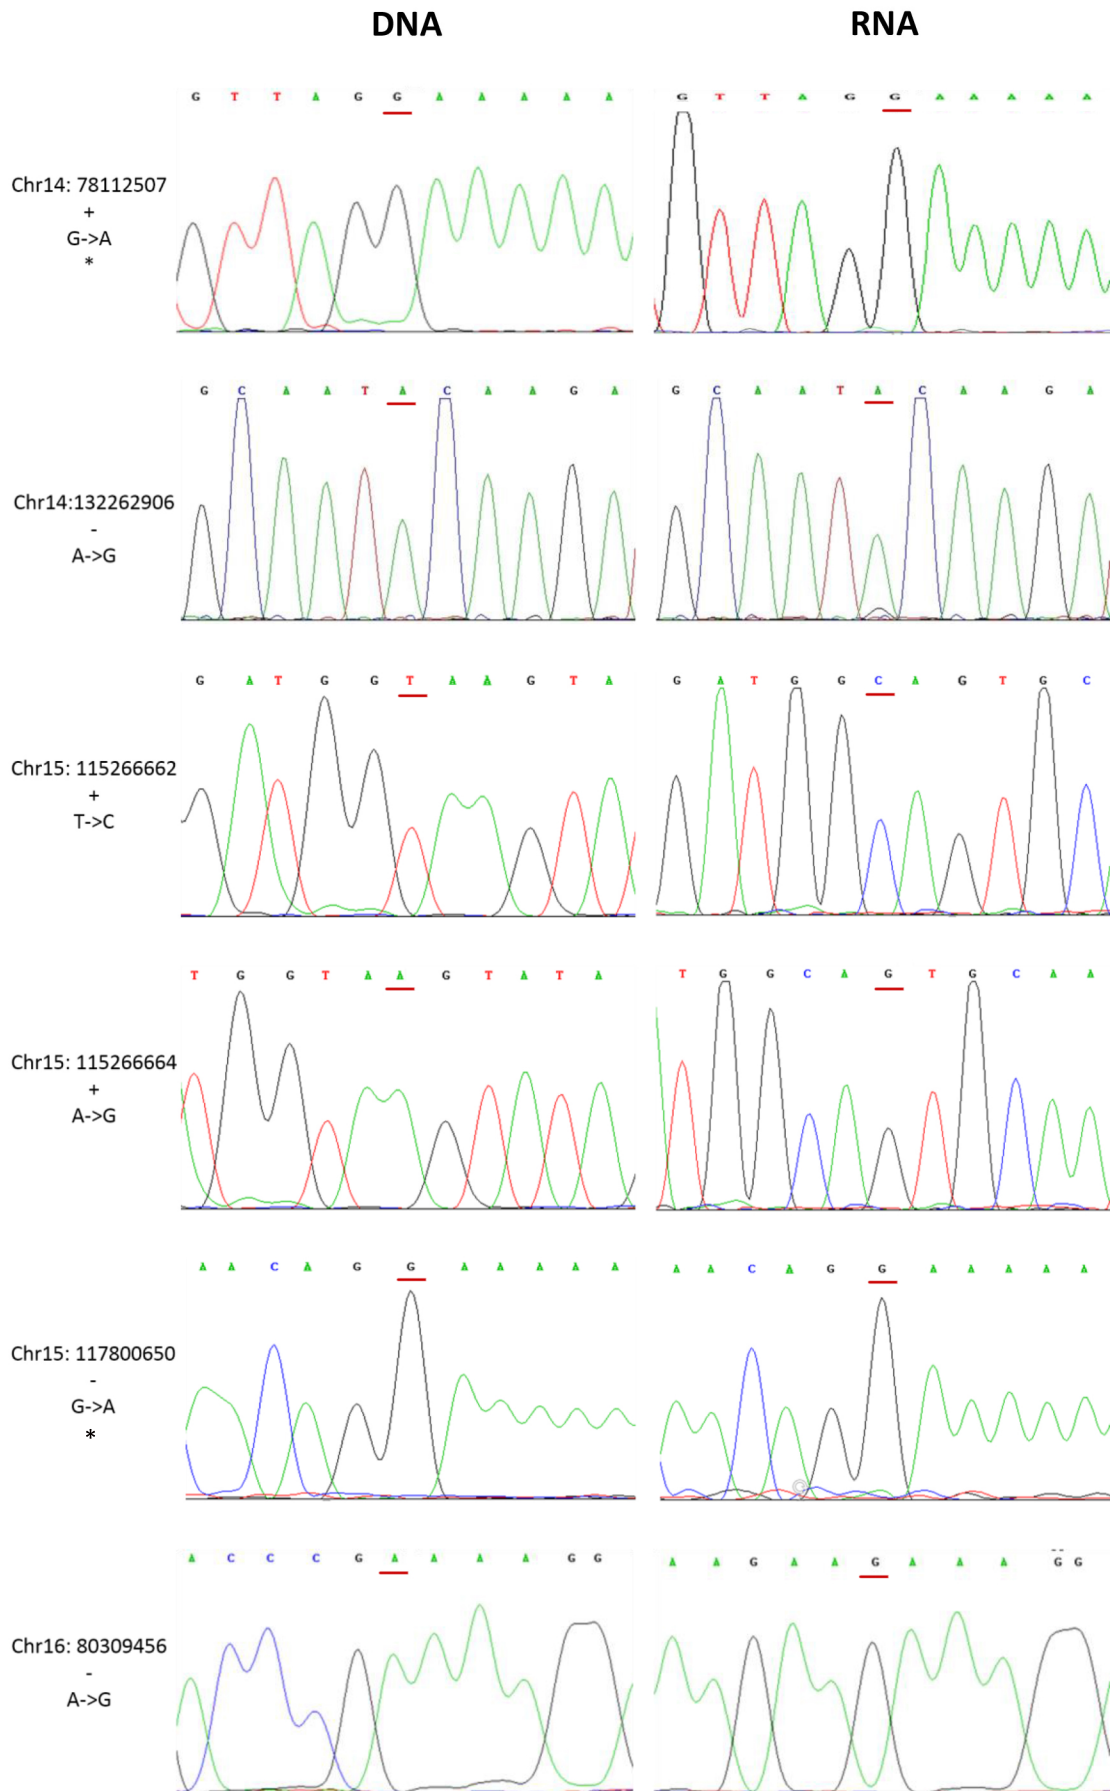

S2-10

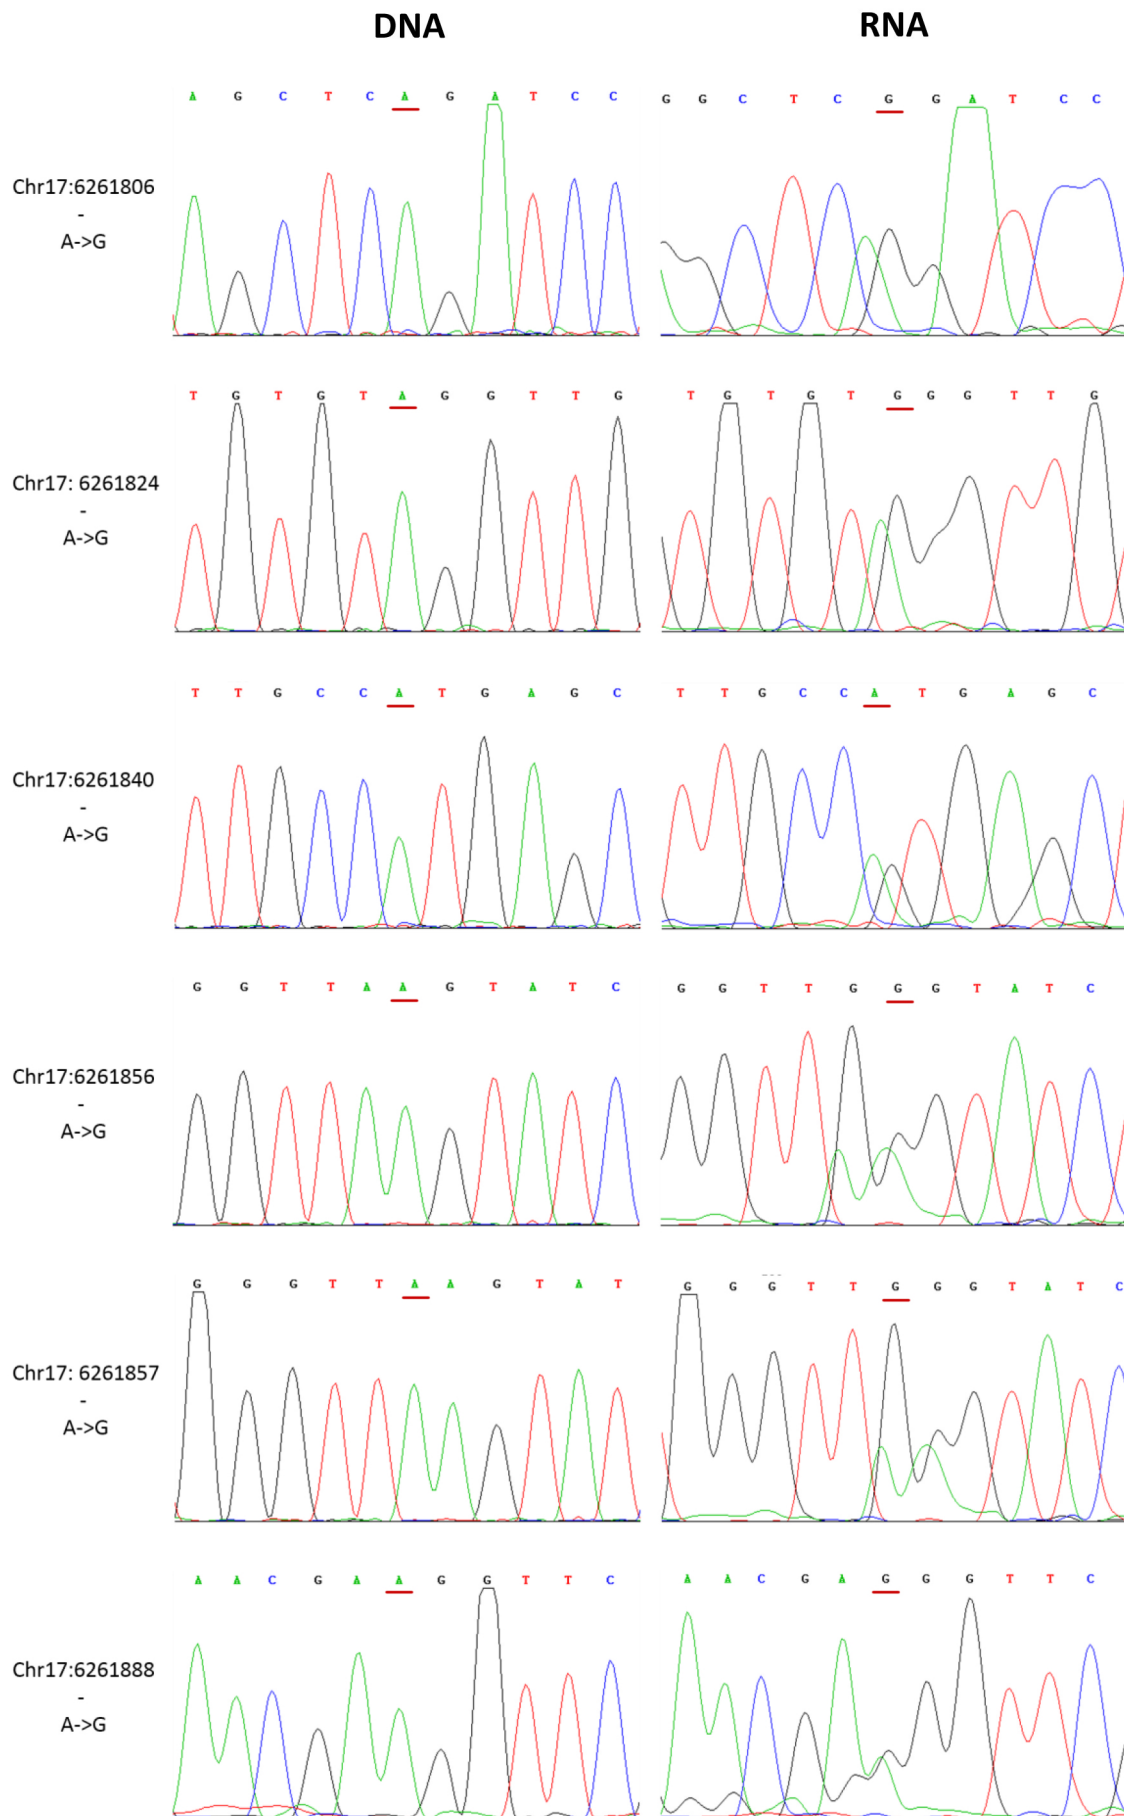

DNA

RNA

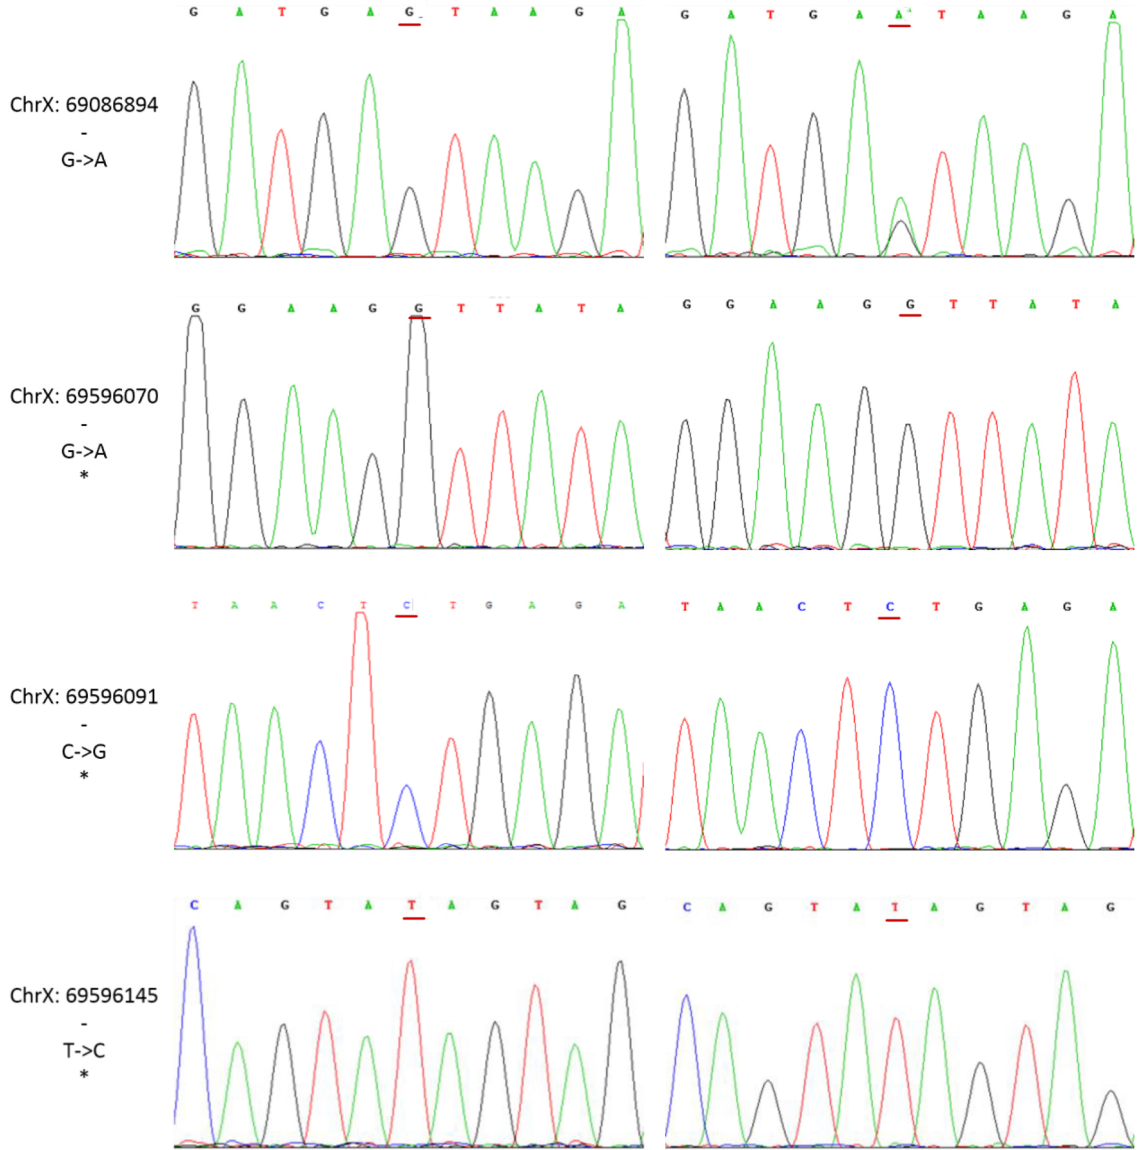

**Figure S3**

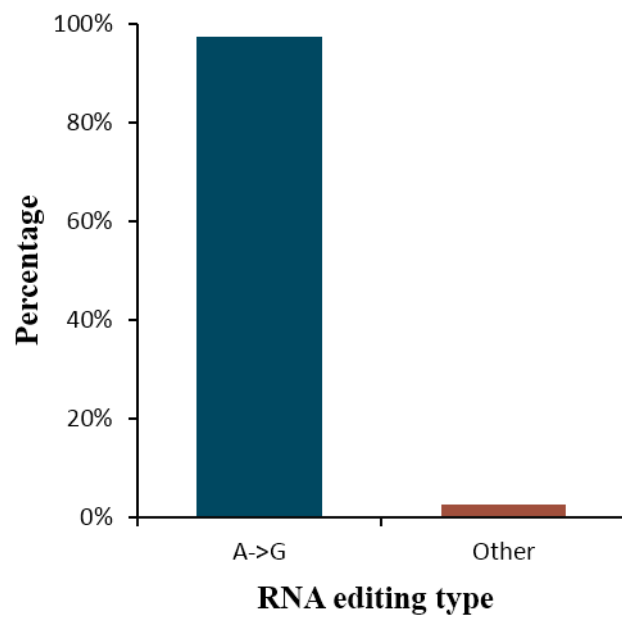

**Figure S4**

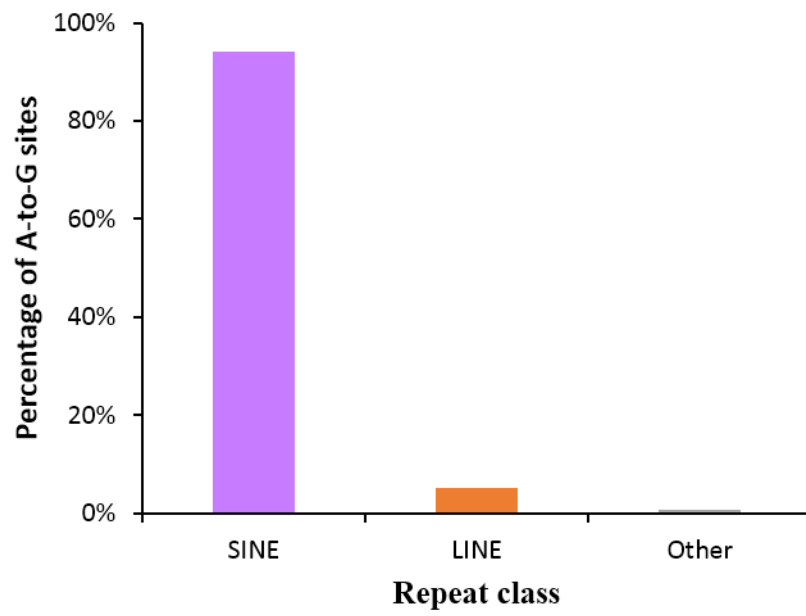

**Figure S5**

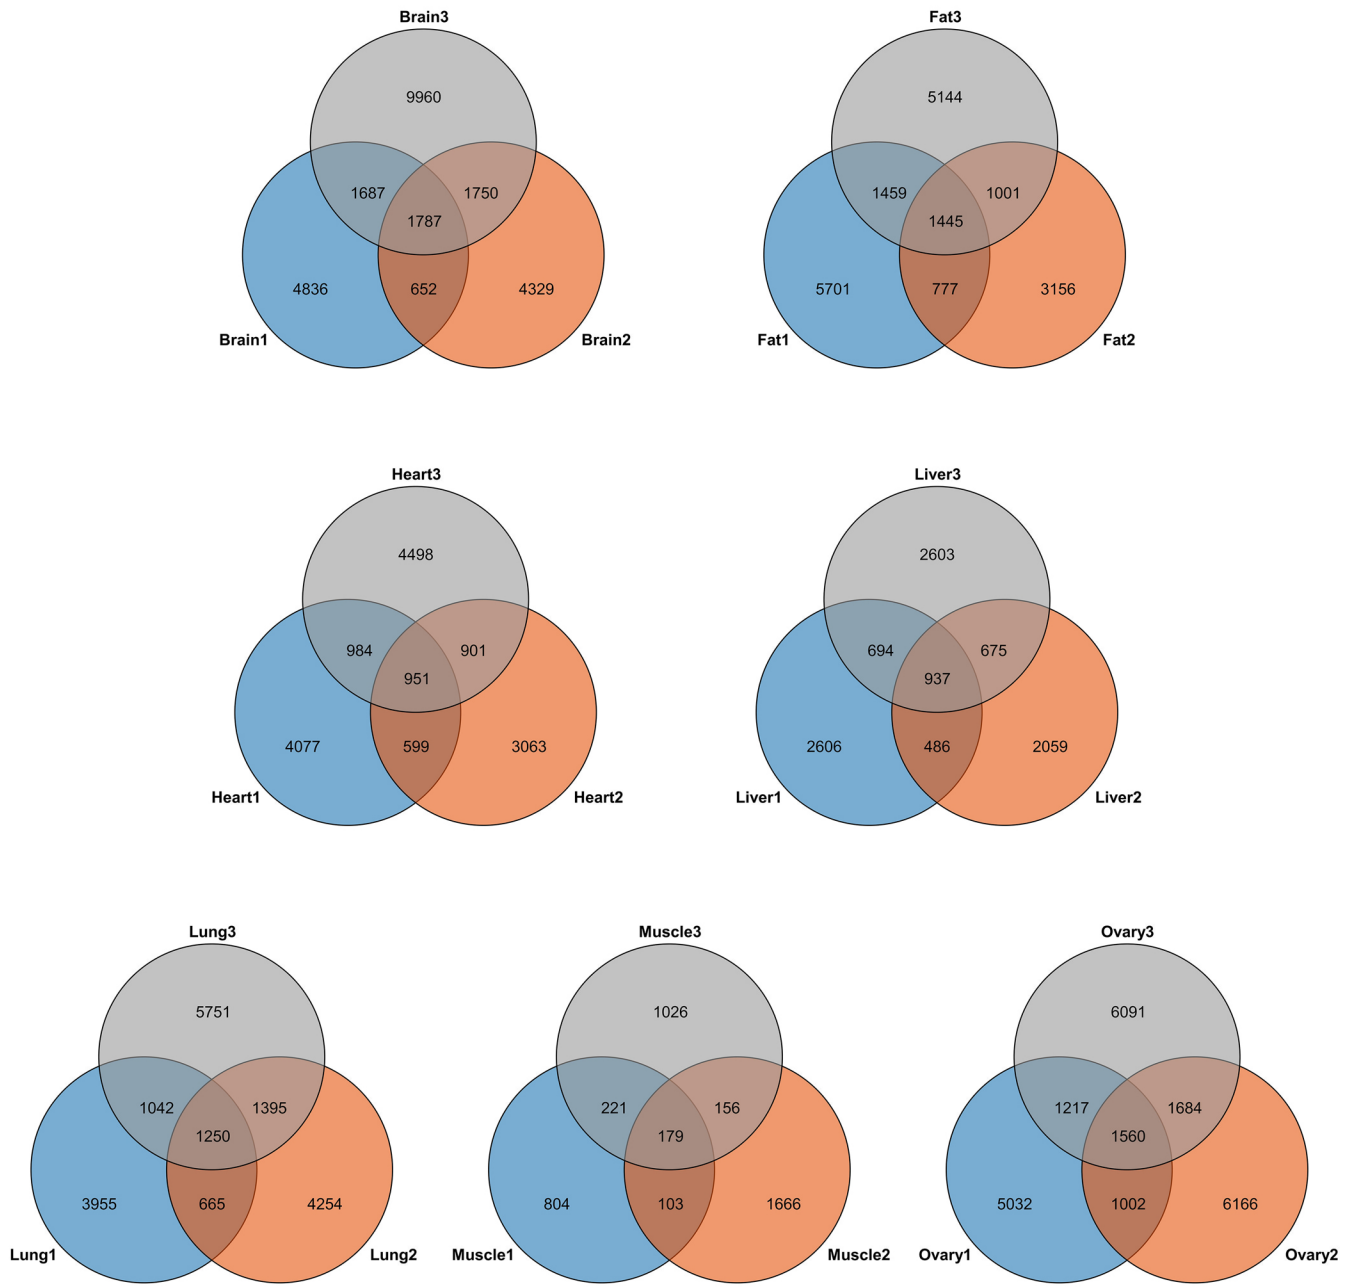

**Figure S6**

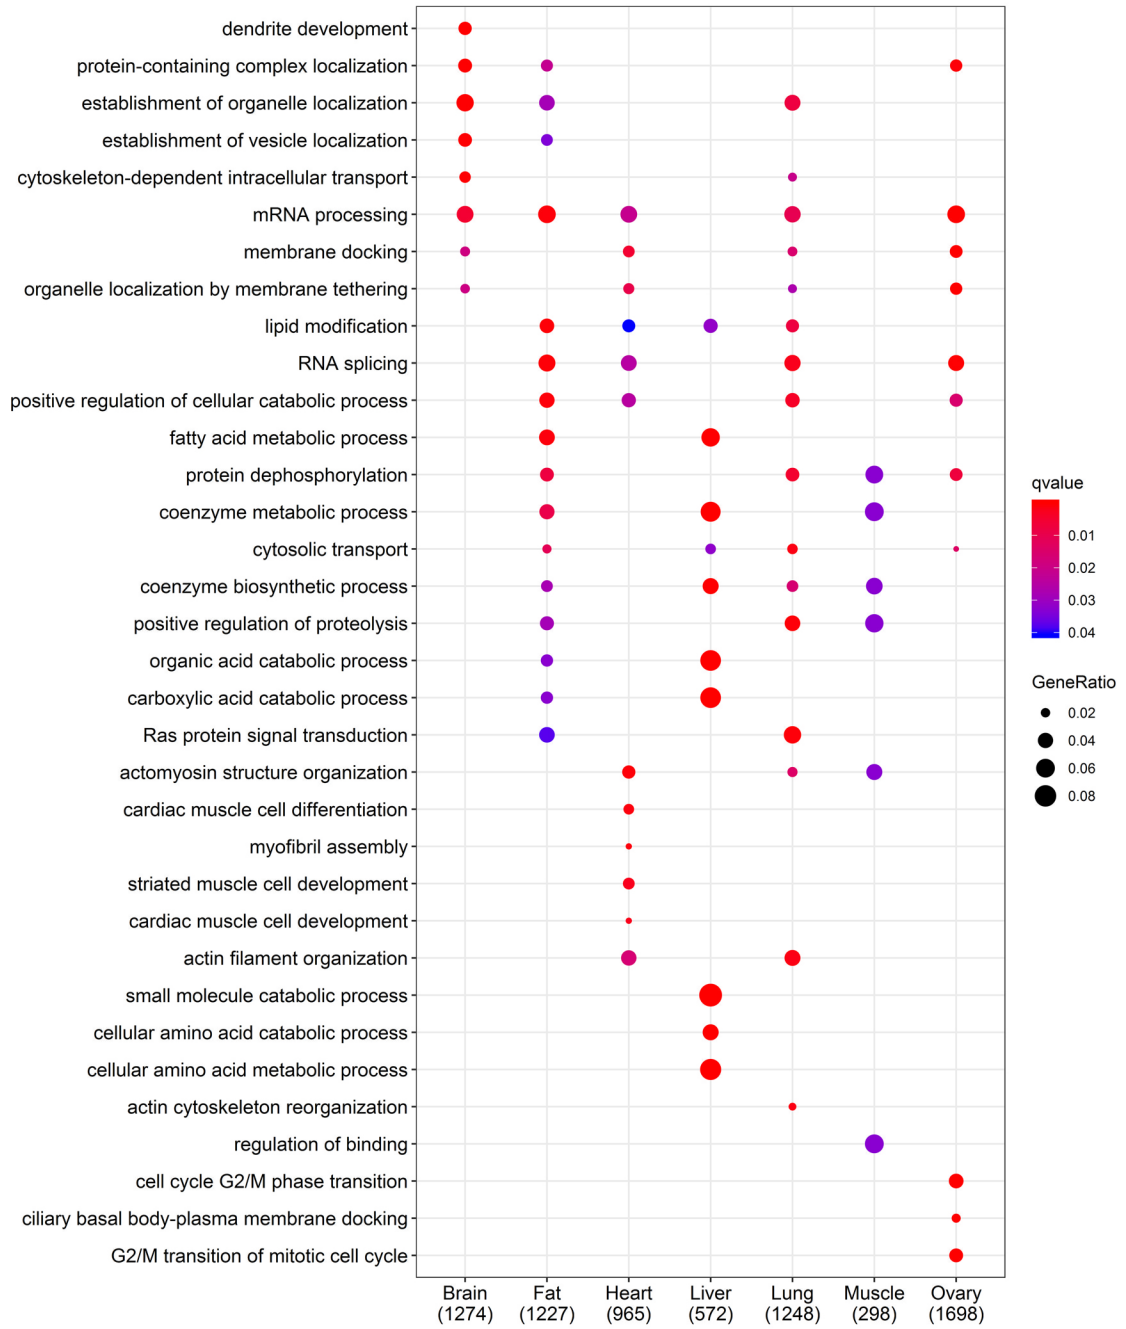



**Figure S7**

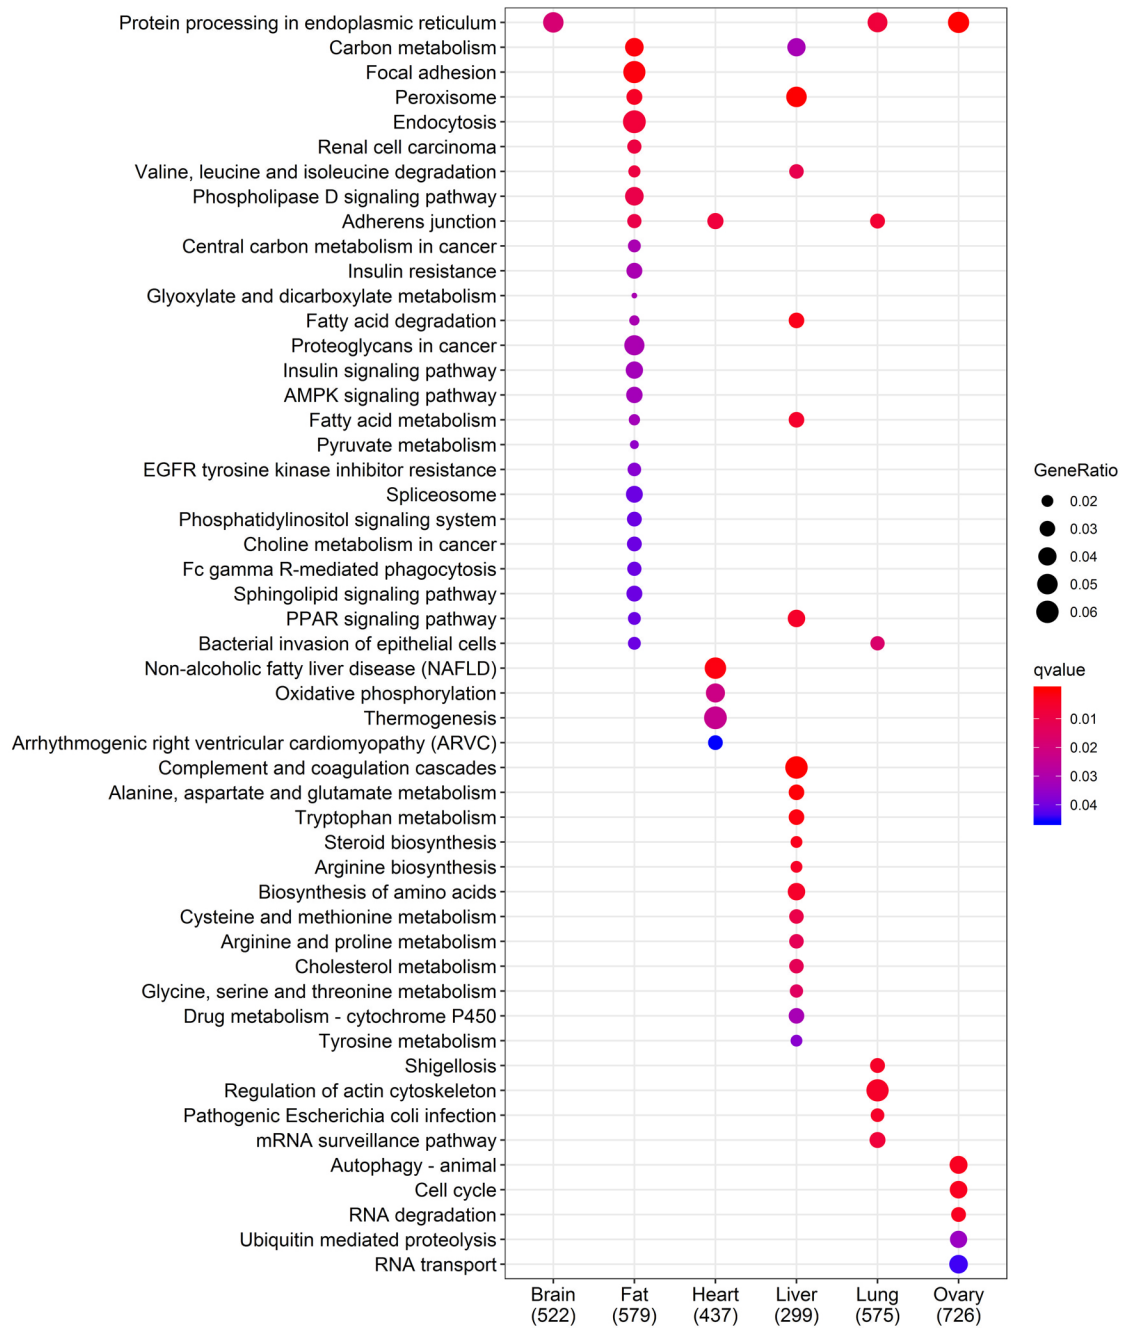

Figure S8

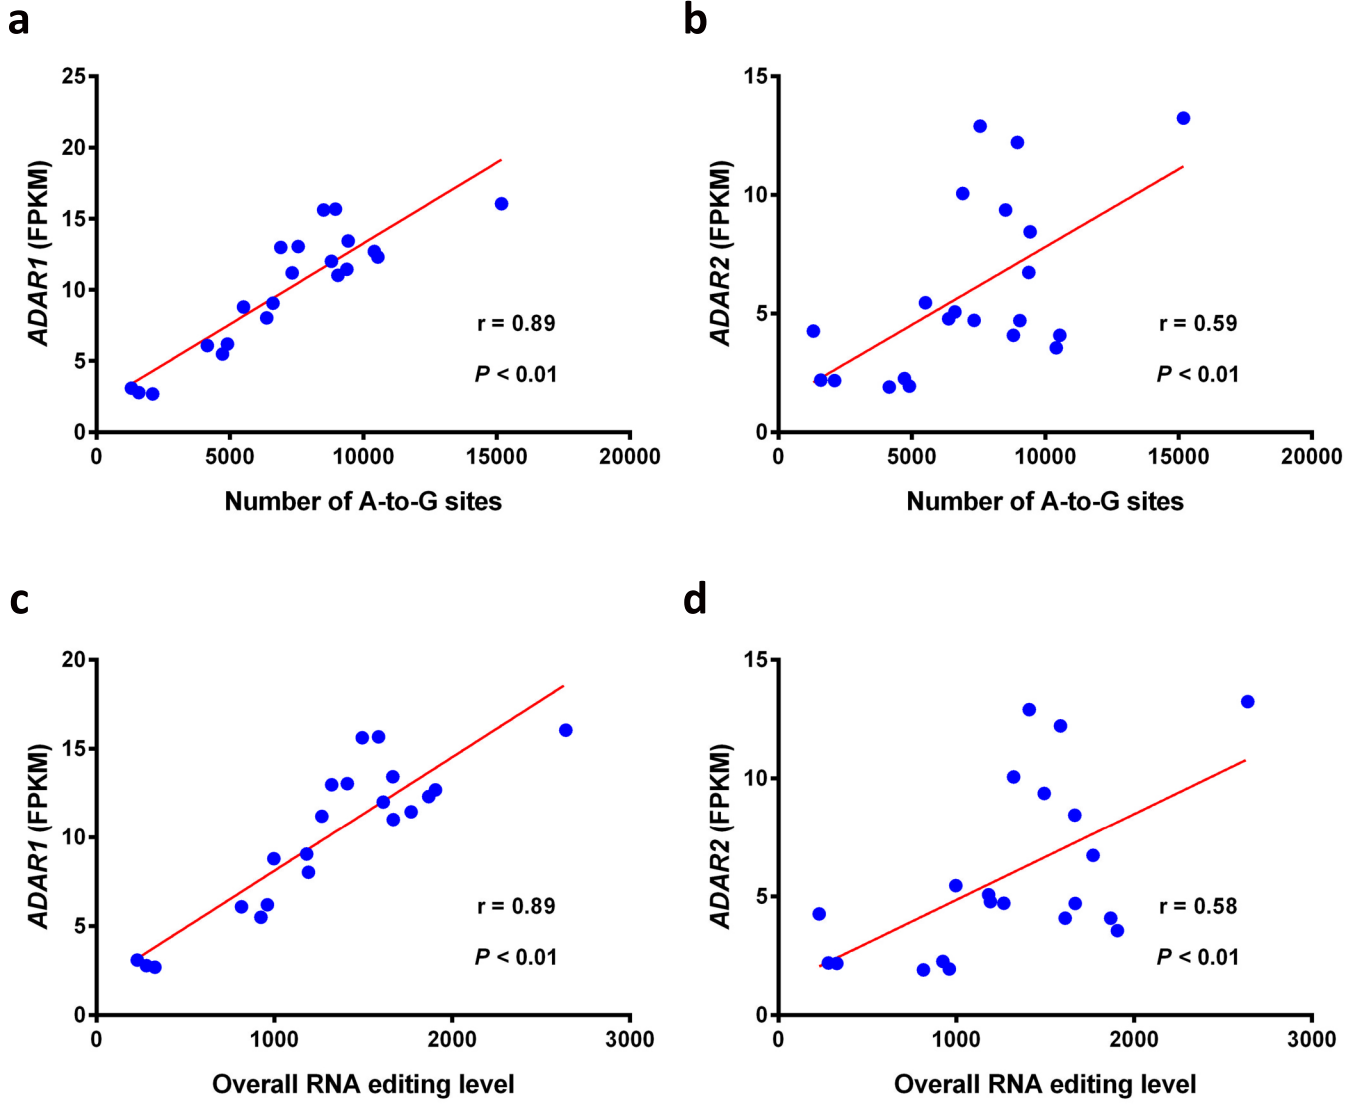

Figure S9

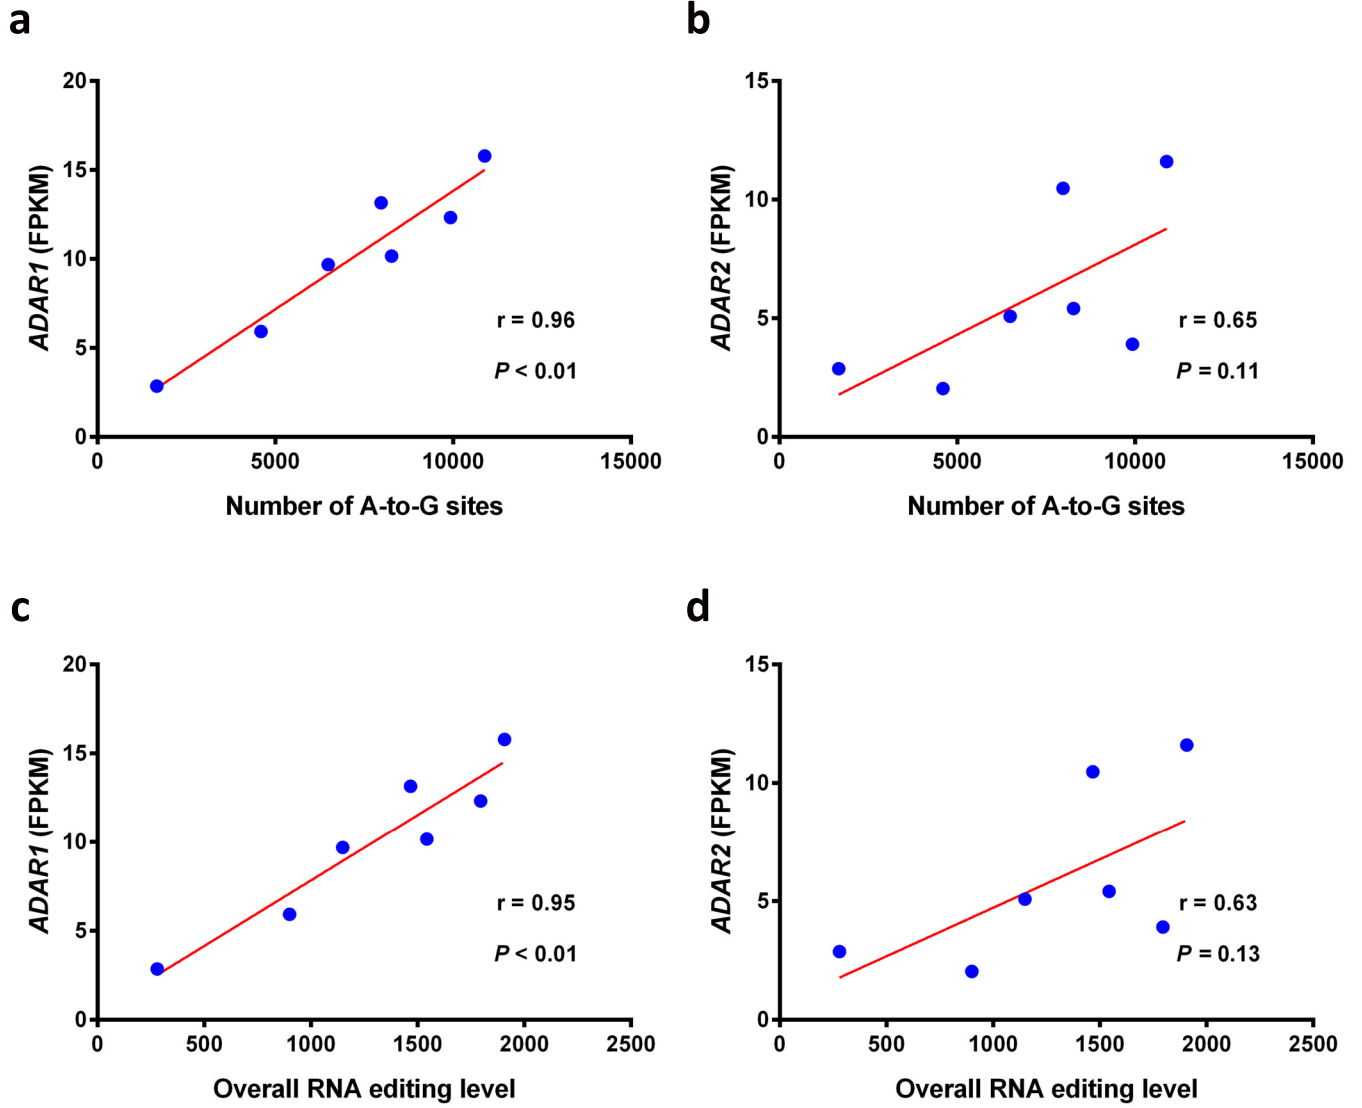

Supplement: 40104_2019_326_MOESM1_ESM.pdf [file 40104_2019_326_MOESM1_ESM.pdf]
