# Supplementary material for: Genome-wide identification of RNA editing in seven porcine tissues by matched DNA and RNA high-throughput sequencing
Source: J Anim Sci Biotechnol. 2019 Mar 13;10:24. doi: 10.1186/s40104-019-0326-9 (PMC6415349; doi:10.1186/s40104-019-0326-9)
Supplement: Supplementary file 7 — Table S6. A-to-G sites resulting in amino acid changes. (XLSX 13 kb) [file 40104_2019_326_MOESM7_ESM.xlsx]

## Sheet: Sheet1
Table S6 A-to-G sites resulting in amino acid changes
Chromosome	Position	Strand	Gene symbol/ID	Amino acid change	Conserved	Sample
1	18733884	+	PPIL4	S/G	U	Brain1,Brain2,Brain3,Fat1,Fat2,Fat3,Heart1,Heart2,Heart3,Liver1,Liver2,Liver3,Lung1,Lung2,Lung3,Muscle1,Muscle2,Muscle3,Ovary1,Ovary2,Ovary3
1	77407763	+	GRIK2	I/V	Y	Brain1
1	77407776	+	GRIK2	Y/C	Y	Brain1
1	77439964	+	GRIK2	Q/R	Y	Brain1
1	134748848	-	USP8	Y/C	U	Brain1,Brain3
1	142626302	-	PDIA3	K/R	U	Muscle2
1	242997932	-	RCL1	R/G	U	Brain1,Brain2,Brain3,Fat1,Fat2,Fat3,Heart1,Heart2,Heart3,Liver1,Liver2,Liver3,Lung1,Lung2,Lung3,Muscle1,Muscle2,Muscle3,Ovary1,Ovary2,Ovary3
2	45025553	+	ENSSSCG00000025406	K/E	U	Brain1,Brain2,Brain3,Fat1,Fat2,Fat3,Heart1,Heart2,Heart3,Liver1,Liver2,Liver3,Lung1,Lung2,Lung3,Muscle1,Muscle2,Muscle3,Ovary1,Ovary2,Ovary3
2	56339054	+	ENSSSCG00000027225	Q/R	U	Fat1,Heart2,Lung3,Ovary1,Ovary2
2	56339245	+	ENSSSCG00000027225	R/G	U	Brain1,Brain3,Fat1,Fat2,Fat3,Heart1,Heart2,Heart3,Liver3,Lung1,Lung2,Lung3,Muscle3,Ovary1,Ovary2,Ovary3
2	56339365	+	ENSSSCG00000027225	S/G	U	Brain1,Brain2,Brain3,Fat1,Fat2,Fat3,Heart1,Heart2,Heart3,Liver1,Liver2,Liver3,Lung1,Lung2,Lung3,Muscle1,Muscle3,Ovary1,Ovary2,Ovary3
2	56339377	+	ENSSSCG00000027225	N/D	U	Brain1,Brain2,Brain3,Fat1,Fat2,Fat3,Heart1,Heart2,Heart3,Liver1,Liver2,Liver3,Lung1,Lung2,Lung3,Muscle1,Muscle3,Ovary1,Ovary2,Ovary3
2	56339839	+	ENSSSCG00000027225	Y/C	U	Brain1,Brain2,Brain3,Fat1,Fat2,Fat3,Heart1,Heart2,Heart3,Liver1,Liver2,Liver3,Lung1,Lung2,Lung3,Muscle1,Muscle2,Muscle3,Ovary1,Ovary2,Ovary3
2	56340235	+	ENSSSCG00000027225	N/D	U	Brain1,Brain2,Brain3,Fat1,Fat2,Fat3,Heart1,Heart2,Heart3,Liver1,Liver2,Liver3,Lung1,Lung2,Lung3,Muscle1,Muscle2,Muscle3,Ovary1,Ovary2,Ovary3
2	56340236	+	ENSSSCG00000027225	N/S	U	Brain1,Brain2,Brain3,Fat1,Fat2,Fat3,Heart1,Heart2,Heart3,Liver1,Liver2,Liver3,Lung1,Lung2,Lung3,Muscle1,Muscle2,Muscle3,Ovary1,Ovary2,Ovary3
2	61816004	+	AKAP8	K/E	U	Fat1
2	89510954	+	DMGDH	I/V	U	Fat2
2	121372260	-	DCP2	T/A	U	Brain2,Brain3,Fat2,Fat3,Heart2,Heart3,Liver3,Lung2,Lung3,Ovary2,Ovary3
2	121406530	-	DCP2	I/V	U	Brain1,Brain2,Brain3,Fat1,Fat2,Fat3,Heart1,Heart2,Heart3,Liver1,Liver2,Liver3,Lung1,Lung2,Lung3,Muscle1,Muscle2,Muscle3,Ovary1,Ovary2,Ovary3
2	122039863	-	ENSSSCG00000014209	Y/C	U	Brain1,Brain2,Brain3,Fat1,Fat2,Fat3,Heart1,Heart2,Heart3,Liver3,Lung1,Lung2,Lung3,Muscle1,Muscle2,Muscle3,Ovary1,Ovary2,Ovary3
3	26091576	-	ACSM4	K/E	U	Liver2
3	43391011	-	ENSSSCG00000028244	R/G	U	Brain1,Brain3,Muscle3
3	68134536	-	ENSSSCG00000022842	T/A	U	Brain1,Brain3,Fat1,Fat3,Heart1,Heart3,Liver1,Liver3,Lung1,Lung3,Muscle1,Muscle3,Ovary1,Ovary3
3	68134992	-	ENSSSCG00000022842	T/A	U	Brain1,Fat1,Heart1,Liver1,Lung1,Muscle1,Ovary1
3	68135052	-	ENSSSCG00000022842	T/A	U	Brain1,Fat1,Heart1,Liver1,Lung1,Muscle1,Ovary1
3	115884636	+	YWHAE	K/E	U	Brain1,Brain3,Fat1,Fat3,Heart1,Heart3,Liver1,Liver3,Lung1,Lung3,Muscle1,Muscle3,Ovary1,Ovary3
3	121038332	+	DNAJC27	K/R	U	Brain2,Brain3,Heart2,Heart3,Lung2,Lung3,Muscle3,Ovary2,Ovary3
4	37106425	+	AZIN1	N/D	Y	Fat1,Fat2,Fat3,Heart1,Heart2,Liver1,Liver3,Lung3,Ovary2
4	90000011	+	DPT	Y/C	U	Fat2,Fat3,Lung2,Lung3,Muscle3
4	97610305	-	ENSSSCG00000028374	T/A	U	Brain2,Lung2
4	98044799	+	COPA	I/V	Y	Fat1,Heart1,Liver1,Lung1,Muscle1,Ovary1
4	120784325	-	ENSSSCG00000006822	E/G	U	Muscle2
4	137183036	+	HFM1	I/V	U	Brain1,Brain3,Fat1,Fat3,Heart2,Heart3,Lung1,Lung2,Lung3,Muscle3,Ovary1,Ovary2,Ovary3
5	67768953	-	KCNA1	I/V	Y	Brain1
6	31447642	+	N4BP1	N/S	U	Heart1
6	39465262	+	KIAA0355	D/G	U	Brain1,Brain2,Brain3,Fat1,Fat2,Fat3,Heart1,Heart2,Heart3,Liver1,Liver2,Liver3,Lung1,Lung2,Lung3,Muscle1,Muscle3,Ovary1,Ovary2,Ovary3
6	64314180	-	ENSSSCG00000003398	K/E	U	Lung1
6	69211150	+	AGMAT	N/S	U	Muscle2
6	73418891	-	ENSSSCG00000026340	R/G	U	Brain2,Brain3
6	83218193	+	HPCA	S/G	U	Fat1,Heart1,Liver1,Lung1,Muscle1
6	86659911	-	INPP5B	I/V	U	Brain1,Brain2,Brain3,Fat1,Fat2,Fat3,Heart1,Heart2,Heart3,Liver1,Liver2,Liver3,Lung1,Lung2,Lung3,Muscle1,Muscle2,Muscle3,Ovary1,Ovary2,Ovary3
7	1961046	+	BPHL	S/G	U	Fat1,Ovary1
7	1961050	+	BPHL	Y/C	U	Fat1,Liver1,Liver3,Lung1,Lung3,Ovary1,Ovary3
7	1961052	+	BPHL	S/G	U	Liver3
7	57608923	-	WHAMM	E/G	U	Brain1,Brain2,Brain3,Fat1,Fat2,Fat3,Heart1,Heart2,Heart3,Liver1,Liver2,Liver3,Lung1,Lung2,Lung3,Muscle1,Muscle2,Muscle3,Ovary1,Ovary2,Ovary3
7	65651131	-	ENSSSCG00000001932	I/V	U	Fat1,Liver2,Ovary1,Ovary3
7	102789222	-	ACOT4	T/A	U	Brain2,Fat2,Liver2,Ovary2
7	123100821	-	ENSSSCG00000002486	K/R	U	Brain2,Liver1,Lung1,Muscle2
7	123112269	-	SERPINA3-2	K/E	U	Brain2,Fat2,Heart2,Muscle2,Ovary2
7	134294719	-	ENSSSCG00000002623	K/E	U	Muscle1
7	134319463	-	ENSSSCG00000002626	I/V	U	Fat3
8	31628992	-	TLR1	N/S	U	Heart3,Ovary3
8	48244993	+	GRIA2	Q/R	Y	Brain1,Fat1
8	48273891	+	GRIA2	R/G	Y	Brain1,Fat1
8	76888582	-	CCNI	K/R	U	Fat1
8	125051886	-	TET2	M/V	U	Lung1
9	39788900	+	GRIA4	R/G	Y	Brain1
9	74314998	+	CD55	N/S	U	Brain1,Brain3,Fat1,Fat2,Fat3,Heart1,Heart2,Heart3,Liver1,Liver2,Liver3,Lung1,Lung2,Lung3,Muscle1,Ovary1,Ovary2,Ovary3
9	94803967	+	BZW2	T/A	U	Brain1,Brain2,Brain3,Fat1,Fat2,Fat3,Heart1,Heart2,Heart3,Liver1,Liver2,Liver3,Lung1,Lung2,Lung3,Muscle1,Muscle2,Muscle3,Ovary1,Ovary2,Ovary3
9	127822232	-	SERPINC1	K/E	U	Fat2,Heart2,Muscle2,Ovary2
11	15771851	-	MRPS31	K/R	U	Brain3,Fat3,Heart3,Liver3,Lung3,Ovary3
11	22178068	+	ENSSSCG00000027815	I/V	U	Brain1,Brain2,Brain3,Fat1,Fat2,Fat3,Heart1,Heart2,Heart3,Liver1,Liver2,Liver3,Lung1,Lung2,Lung3,Muscle1,Muscle2,Muscle3,Ovary1,Ovary2,Ovary3
11	22178078	+	ENSSSCG00000027815	D/G	U	Lung1
11	26303082	-	NAA16	K/E	U	Brain3,Lung1,Lung3,Muscle3,Ovary1,Ovary3
11	76001867	+	CLYBL	I/V	U	Fat2
11	86168149	-	CUL4A	T/A	U	Brain1,Fat1,Heart1,Liver1,Lung1,Muscle1,Ovary1
12	49251054	-	MRM3	H/R	U	Brain1,Brain2,Brain3,Fat1,Fat2,Fat3,Heart1,Heart2,Liver1,Liver3,Lung1,Lung2,Lung3,Muscle1,Muscle2,Muscle3,Ovary1,Ovary2
13	36910709	-	DCAF1	I/V	U	Brain2,Brain3,Fat2,Fat3,Heart2,Heart3,Liver2,Liver3,Lung2,Lung3,Muscle2,Muscle3,Ovary2,Ovary3
13	75597972	+	PPARG	M/V	U	Muscle3
13	127837602	-	CCDC39	I/V	U	Heart1,Liver1,Lung1,Lung3,Ovary1,Ovary2
13	131136652	+	YEATS2	T/A	U	Brain1,Brain2,Brain3,Fat1,Fat2,Fat3,Heart1,Heart3,Liver1,Liver3,Lung1,Lung2,Lung3,Ovary1,Ovary2,Ovary3
13	210726433	+	RIPPLY3	I/V	U	Lung1,Lung2,Lung3,Ovary2
14	100785756	+	RPL37A	T/A	U	Brain1,Brain2,Brain3,Fat1,Fat2,Fat3,Heart1,Heart2,Heart3,Liver1,Liver2,Liver3,Lung1,Lung2,Lung3,Muscle1,Muscle2,Muscle3,Ovary1,Ovary2,Ovary3
14	110131920	-	LIPA	I/V	U	Muscle2
14	113577351	-	IDE	K/R	U	Lung1
14	115926894	+	ENSSSCG00000024537	E/G	U	Liver2
15	1008754	+	RND3	Q/R	U	Lung1
15	18996993	+	ZRANB3	E/G	U	Brain1,Brain2,Fat1,Fat3,Heart3,Liver2,Lung1,Lung2,Ovary1,Ovary2,Ovary3
15	53240664	-	UFSP2	R/G	U	Fat3
15	98123870	+	DUSP19	I/M	U	Heart2
15	104523743	+	WDR75	N/S	U	Brain1,Brain2,Brain3,Fat1,Fat2,Fat3,Heart1,Heart2,Heart3,Liver1,Liver2,Liver3,Lung1,Lung2,Lung3,Muscle1,Muscle2,Muscle3,Ovary1,Ovary2,Ovary3
15	106952579	-	STAT4	T/A	U	Brain3,Fat1,Lung1,Lung2,Lung3,Ovary1
15	115266664	+	SPATS2L	N/S	U	Brain1,Brain2,Brain3,Fat1,Fat2,Fat3,Heart1,Heart2,Heart3,Liver1,Liver2,Liver3,Lung1,Lung2,Lung3,Muscle1,Muscle2,Muscle3,Ovary1,Ovary2,Ovary3
15	115458795	+	AOX1	I/V	U	Muscle1
16	29336065	+	ENSSSCG00000016869	K/E	U	Brain1,Brain2,Brain3,Fat1,Fat2,Heart1,Heart2,Heart3,Liver1,Liver2,Liver3,Lung1,Lung2,Lung3,Muscle1,Muscle2,Muscle3,Ovary1,Ovary2,Ovary3
16	31468778	-	ATP5H	T/A	U	Brain1,Brain2,Fat1,Fat2,Heart1,Heart2,Liver1,Liver2,Lung1,Lung2,Muscle1,Muscle2,Ovary1,Ovary2
17	12526432	-	KAT6A	E/G	U	Lung1
18	26695657	-	PTPRZ1	T/A	U	Brain1,Brain2,Brain3,Fat3
X	64558081	-	ENSSSCG00000030084	T/A	U	Brain1,Brain2,Fat1,Fat2,Heart1,Liver1,Liver2,Lung1,Lung2,Muscle1,Muscle2,Ovary1,Ovary2
X	108819853	+	HTR2C	I/V	Y	Brain1
X	108819855	+	HTR2C	I/M	Y	Brain1
X	108819860	+	HTR2C	N/S	Y	Brain1
X	108819865	+	HTR2C	I/V	Y	Brain1
X	115848113	+	GRIA3	R/G	Y	Brain1,Heart1,Ovary1
U: unknown; Y: yes; Conserved: The sites were conserved between humans and pigs in the same genes
